1 GRADING prognostic factors for severe and recurrent  
2 *Clostridioides difficile* infection: expected and unexpected  
3 findings. A systematic review.  
4

5 Tessel M. van Rossen<sup>1\*#</sup>, Rogier E. Ooijevaar<sup>2\*#</sup>, Christina M.J.E. Vandenbroucke-Grauls<sup>1,3</sup>, Olaf M.  
6 Dekkers<sup>4</sup>, Ed. J. Kuijper<sup>5</sup>, Josbert J. Keller<sup>6,7</sup>, Joffrey van Prehn<sup>5</sup>

7

8 <sup>1</sup> Amsterdam UMC, VU University Medical Center, Medical Microbiology & Infection Control,  
9 Amsterdam Infection & Immunity, Amsterdam, The Netherlands

10 <sup>2</sup> Amsterdam UMC, VU University Medical Center, Gastroenterology & Hepatology, Amsterdam  
11 Gastroenterology Endocrinology Metabolism, Amsterdam, The Netherlands

12 <sup>3</sup> Aarhus University, Clinical Epidemiology, Aarhus, Denmark

13 <sup>4</sup> Leiden University Medical Center, Clinical Epidemiology, Leiden, The Netherlands

14 <sup>5</sup> Leiden University Medical Center, Center for Infectious Diseases, Medical Microbiology, Leiden, The  
15 Netherlands

16 <sup>6</sup> Haaglanden Medical Center, Gastroenterology & Hepatology, the Hague, the Netherlands

17 <sup>7</sup> Leiden University Medical Center, Gastroenterology & Hepatology, Leiden, the Netherlands

18

19 \*Both authors contributed equally and should be considered first author

20 # Address correspondence to Tessel M. van Rossen, Amsterdam UMC locatie VUmc, PK 2X132, De  
21 Boelelaan 1117, Amsterdam, the Netherlands, t.vanrossen@amsterdamumc.nl, telephone number:  
22 0031-204440799.

23 Or

24 Rogier E. Ooijevaar, Amsterdam UMC locatie VUmc, PK 2X132, De Boelelaan 1117, Amsterdam, the  
25 Netherlands, r.ooijevaar@amsterdamumc.nl, telephone number: 0031-204440799.

26

27 Abstract: 300 words

28 Manuscript: 3635 words

29

30

NOTE: This preprint reports new research that has not been certified by peer review and should not be used to guide clinical practice.

## 31 Abstract

32

### 33 Background

34 *Clostridioides difficile* infection (CDI), its subsequent recurrences (rCDI), and severe CDI (sCDI) provide  
35 a significant burden for both patients and the healthcare system. Treatment consists of oral  
36 antibiotics. Fidaxomicin, bezlotoxumab and fecal microbiota transplantation (FMT) reduce the number  
37 of recurrences compared to vancomycin, but are more costly. Identifying patients diagnosed with  
38 initial CDI who are at increased risk of developing sCDI/rCDI could lead to more cost-effective  
39 therapeutic choices.

40

### 41 Objectives

42 In this systematic review we aimed to identify clinical prognostic factors associated with an increased  
43 risk of developing sCDI or rCDI.

44

### 45 Methods

46 PubMed, Embase, Emcare, Web of Science and COCHRANE Library databases were searched from  
47 database inception through March, 2021. Study selection was performed by two independent  
48 reviewers on the basis of predefined selection criteria; conflicts were resolved by consensus. Cohort  
49 and case-control studies providing an analysis of clinical or laboratory data to predict sCDI/rCDI in  
50 patients  $\geq 18$  years diagnosed with CDI, were included. Risk of bias was assessed with the Quality in  
51 Prognostic Research (QUIPS) tool and the quality of evidence by the Grading of Recommendations  
52 Assessment, Development and Evaluation (GRADE) tool, modified for prognostic studies. Overview  
53 tables of prognostic factors were constructed to assess the number of studies and the respective  
54 direction of an association (positive, negative, or no association).

55

### 56 Results and conclusions

57 136 studies were included for final analysis. Higher age and the presence of multiple comorbidities  
58 were prognostic factors for sCDI. Identified risk factors for rCDI were higher age, healthcare-  
59 associated CDI, prior hospitalization, PPIs started during/after CDI diagnosis and previous rCDI. Some  
60 variables that were found as risk factors for sCDI/rCDI in previous reviews were not confirmed in the  
61 current review, which can be attributed to differences in methodology. Risk stratification for  
62 sCDI/rCDI may contribute to a more personalized and optimal treatment for patients with CDI.

63

64

65

66

67

68

## 69 Background

70 *Clostridioides difficile* infection (CDI), its subsequent recurrences (rCDI), and severe CDI (sCDI) provide  
71 a significant burden for both patients and the healthcare system(1). Antibiotic treatment with oral  
72 vancomycin and fidaxomicin are the cornerstone of CDI treatment(2-4). Fidaxomicin reduces the  
73 number of recurrences compared to vancomycin (5). Bezlotoxumab, a monoclonal anti-Toxin B  
74 antibody, can be added to oral anti-CDI antibiotic therapy and reduces the number or recurrences in  
75 patients at high risk to develop rCDI (6). Fecal microbiota transplantation (FMT) is a highly efficacious  
76 treatment for rCDI, preventing subsequent recurrences, and can lower mortality risk and disease  
77 burden of sCDI (7, 8).

78 The costs of fidaxomicin, bezlotoxumab and FMT are higher compared to those of vancomycin.  
79 Identifying patients diagnosed with initial CDI who are at an increased risk of developing a severe  
80 episode or recurrences could lead to more cost-effective therapeutic choices. Identifying patients at  
81 risk, however, is challenging. Several prediction models have been developed (9-30), yet none has  
82 been widely adopted in clinical practice.

## 83 Objectives

84 In this systematic review we aimed to identify clinical prognostic factors associated with an increased  
85 risk of developing sCDI or rCDI.

## 86 Methods

### 87 Data sources

88 Two searches were performed to identify risk factors for (1) sCDI and (2) rCDI. The search terms and  
89 strategy were constructed by a trained librarian, see **Supplementary data**. PubMed, Embase,  
90 Emcare, Web of Science and COCHRANE Library databases were searched on October 4<sup>th</sup>, 2019. An  
91 update of the search was performed on March 13<sup>th</sup>, 2021. The search was restricted to articles  
92 published in English. Meeting abstracts were not considered. The search was not limited by year of  
93 publication. References of key papers were assessed for relevant papers.

### 94 Study eligibility criteria

95 Study eligibility was assessed in a two-step selection process. Two independent reviewers screened  
96 title and abstract for potentially eligible articles (TvR and RO); discrepancies were resolved by  
97 consensus. Full-text articles were retrieved for eligibility; data extraction and risk of bias assessment  
98 of included studies was performed by two researchers (TvR and RO).

99 Inclusion criteria: prospective and retrospective cohort and case-control studies including patients  
100 ≥18 years, diagnosed with CDI, and providing an analysis of clinical or laboratory data to predict  
101 severe/recurrent CDI.

102 Exclusion criteria: study in specific patient populations with a distinct medical condition other than  
103 CDI (e.g. study population comprises only hemodialysis patients), and small studies (less than 30  
104 patients with severe/recurrent CDI). Laboratory values that were studied as prognostic factors, but  
105 which are not part of the regular work-up in CDI (e.g. assays for specific cytokines). Variables that are  
106 part of (some of) the definitions of sCDI (such as leukocytosis) were excluded as prognostic factor for  
107 sCDI to avoid circularity.

108 Studies on prognostic factors with conflicting results in the uni- and multivariable or with  
109 contradicting results when compared to previous meta-analyses, were assessed and graded by a  
110 third researcher (CV-G and JK) and scrutinized by weighing the results by the quality of evidence per  
111 study.

112 Outcomes of interest were:

113 1. Severe CDI:

114 a. ESCMID 2014/2021 definition: an episode of CDI with (one or more specific signs and  
115 symptoms of) severe colitis or a complicated course of disease, with significant systemic  
116 toxin effects and shock, resulting in need for ICU admission, colectomy or death (3, 31,  
117 32); or:

118 b. IDSA/SHEA definition: an episode of CDI with a white blood cell count of  $\geq 15 \times 10^9$   
119 cells/mL or a serum creatinine level  $> 1.5$  mg/dL or increase of 50% or greater from  
120 baseline(33); or:

121 c. Any other author-constructed definition of severe/complicated/fulminant/fatal CDI.  
122

123 2. Recurrent CDI: Recurrence is a new episode of CDI within 2-12 weeks after a previous episode,  
124 provided the symptoms of the previous episode resolved after completion of initial treatment  
125 (34, 35).

## 126 Assessment of risk of bias

127 Risk of bias was assessed with the Quality in Prognostic Research (QUIPS) tool (36), which is  
128 recommended by the Cochrane Prognosis Methods Group. The QUIPS tool appraises six domains: (1)  
129 study participation, (2) study attrition, (3) prognostic factor measurement, (4) outcome  
130 measurement, (5) study confounding and (6) statistical analysis and reporting. The overall risk of bias  
131 per study is scored as low, moderate, or high.

## 132 Quality assessment and data synthesis

133 The quality of evidence per study was assessed by using the Grading of Recommendations  
134 Assessment, Development and Evaluation (GRADE) tool, modified for prognostic studies (**Figure 1**)  
135 (37). This tool is recommended by the Cochrane Prognosis Methods Group and consists of eight  
136 domains. The starting point for the quality of evidence is based on the phase of investigation. The  
137 quality can be up- or downgraded according to seven other domains. The QUIPS score is included in  
138 the second domain ('Study limitations/risk of bias') of the GRADE tool. The outcome of this  
139 assessment is the quality of evidence per study, which can be very low (+), low (++), moderate (+++)  
140 or high (++++).

141 Overview tables of prognostic factors were constructed to assess the number of studies and the  
142 respective direction of an association, i.e. positive, negative, or no association based on effect  
143 estimates, 95% CI intervals and p values, stratified by univariate and multivariate analyses. Similar  
144 prognostic factors (e.g. coronary artery disease and myocardial infarction) were combined to one  
145 factor for a more compact overview. No formal meta-analyses were performed.

| 8 domains                 |                                                                                                                                           | Score             |
|---------------------------|-------------------------------------------------------------------------------------------------------------------------------------------|-------------------|
| 1. Phase of investigation | 1=association / 2=independent association / 3=underlying mechanism<br>Quality of evidence: + very low / ++ low / +++ moderate / ++++ high | 1/2/3<br>+ - ++++ |
| 2. Study limitations      | risk of bias (QUIPS)                                                                                                                      | ✓/✗               |
| 3. Inconsistency          | heterogeneity in results across studies                                                                                                   | ✓/✗               |
| 4. Indirectness           | subset of population of interest/prognostic factor/outcome                                                                                | ✓/✗               |
| 5. Imprecision            | sample size (calculation), ≥10 patients with outcome per prognostic factor                                                                | ✓/✗               |
| 6. Publication bias       | factor is repetitively investigated, ideally by phase 2-3 studies                                                                         | ✓/✗               |
| 7. Effect size            | moderate/large similar effect is reported by most studies                                                                                 | ✓/✗               |
| 8. Dose-effect            | (continuous/ordinal variables)                                                                                                            | ✓/✗               |

Quality of evidence is up- or downgraded depending on domains 2-8

146  
147 **Figure 1.** Grading of Recommendations Assessment, Development and Evaluation (GRADE) tool, modified for  
148 prognostic studies. The final outcome is the overall quality of evidence per study, which can be very low (+), low  
149 (++) , moderate (+++) or high (++++).

150

## 151 Results

152 The search for prognostic factors for sCDI yielded 1242 references; 126 studies were assessed in  
153 more detail and 76 were included for analysis (20, 24, 25, 29, 38-109); twelve more studies retrieved  
154 from cross-references were also included (110-121) resulting in 88 studies for final analysis (**Figure**  
155 **2**). The search for prognostic factors for rCDI yielded 1104 references; 105 studies were assessed in  
156 more detail and 36 were included for analysis (9, 10, 12-15, 102, 109, 122-149) as were seven studies  
157 from cross-references.) (111, 150-155). This resulted in 43 studies for final analysis (**Figure 2**).  
158 Additionally, data of the pivotal RCTs on fidaxomicin and bezlotoxumab were used to support  
159 findings (156-160).

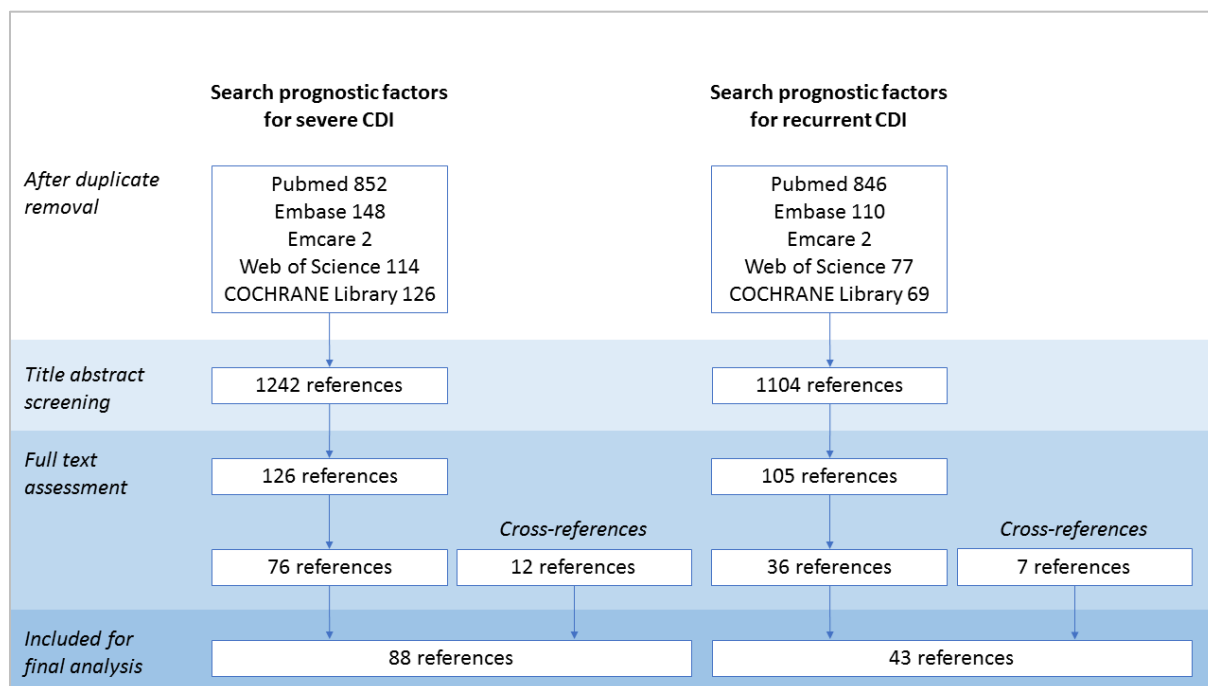

160  
161 **Figure 2.** Flow diagram of the selection process of studies on prognostic factors for severe/recurrent CDI

## 162 Prognostic factors for severe CDI

163 The overall quality of evidence ranged from very low to moderate, mainly due to the retrospective  
164 nature and small sample size of most studies. The prognostic factors studied in five or more articles  
165 are shown in **Table 1**.

166 *Age* was the most studied prognostic factor, and was investigated in 53 of 88 included studies (20,  
167 24, 25, 29, 38-42, 44, 46-49, 52, 54, 55, 57, 59, 61-64, 66, 70, 71, 75, 77, 78, 80, 81, 83, 85-88, 91-94,  
168 96, 97, 100, 104, 106, 109-111, 113, 114, 116-118). Fifty-one studies performed a univariate analysis  
169 and 40 studies (also) a multivariable analysis; 37/51 studies reported *higher age* as risk factor for  
170 sCDI in univariate analysis, and 26/40 studies in multivariable analysis (overall moderate quality of  
171 evidence).

172 Thirty-two studies assessed the presence of *multiple comorbidities* as risk factor for sCDI (25, 38-42,  
173 46-49, 52, 62, 66, 70, 72-74, 80, 81, 85, 87, 88, 91-94, 96, 97, 109, 114, 116, 117); 20/30 studies  
174 found an association between the presence of *multiple comorbidities* and sCDI in univariate analysis  
175 and 11/23 studies in multivariable analysis (moderate quality of evidence).

176 For both higher age and the presence of multiple comorbidities a dose effect was observed: the  
177 higher the age or the more concurrent disorders, the higher the risk of severe disease. No specific  
178 medical condition was associated with sCDI.

179 For clinical decision making, a specific cut-off value for age and number of comorbidities would be  
180 convenient. However, in many studies age was used as a continuous variable (31/53 studies) or  
181 varying cut-off values are used. The majority of studies found a higher risk for sCDI in patients older  
182 than 65-70 years. For comorbidity, different established or self-constructed comorbidity scores were  
183 reported, the Charlson Comorbidity Index (CCI) most frequently (161). Again, most studies used CCI  
184 as continuous variable. Of the studies that identified more comorbidities as risk factor for sCDI, only  
185 three used a cut-off value: one study reported a higher risk in patients with a CCI of  $\geq 3$ , and two  
186 found a higher risk in patients with  $\geq 2$  comorbidities (88, 93, 96). Thus, no statement can be made on  
187 the association between exact numbers of comorbidities and severe CDI.

188 Twenty articles studied the association between the presence of NAP1/RT027 strain and sCDI (44-46,  
189 56, 60, 61, 73, 74, 81, 84, 85, 88, 89, 91, 94, 96, 100, 101, 108, 111); 8/19 studies reported a higher  
190 risk of sCDI in patients with NAP1/027 strain in univariate analysis, and 5/10 in multivariate analysis.  
191 One study found that NAP1/027 was more prevalent in patients with mild disease compared to  
192 patients with sCDI (44).

193 Furthermore, seven studies assessed *C. difficile* binary toxin as risk factor for sCDI (45, 82, 91, 94,  
194 117, 119, 121). Of these, three identified *C. difficile* binary toxin as a risk factor for sCDI in univariate  
195 analysis, and only 1/1 study in multivariate analysis. The overall quality of evidence of these studies  
196 was low. We scrutinized the separate studies on the presence of NAP1/RT027 strain and/or binary  
197 toxin by weighing the results by the quality of evidence per study, but this did not alter the  
198 conclusion.

199 Another interesting finding was that the majority of studies did not find an association between the  
200 use of *PPIs*, *H2 receptor antagonists* or *antibiotics* and the occurrence of sCDI in uni- and multivariate  
201 analyses. However, the quality of evidence was low.

202 In conclusion, only the factors *higher age (>65-70 years old)* and the presence of *multiple*  
203 *comorbidities* were consistently associated with sCDI (**Table 3**).

| Potential prognostic factor           | Number of participants | Number of studies | Univariate |    |    | Multivariate |    |    | GRADE factors |                   |               |              |             |                  |                            |             |                     |
|---------------------------------------|------------------------|-------------------|------------|----|----|--------------|----|----|---------------|-------------------|---------------|--------------|-------------|------------------|----------------------------|-------------|---------------------|
|                                       |                        |                   | +          | 0  | -  | +            | 0  | -  | Phase         | Study limitations | Inconsistency | Indirectness | Imprecision | Publication bias | Moderate/large effect size | Dose effect | Quality of evidence |
| <b>Demographics</b>                   |                        |                   |            |    |    |              |    |    |               |                   |               |              |             |                  |                            |             |                     |
| Higher age                            | 4,240,336              | 53                | 37         | 14 | 0  | 26           | 14 | 0  | 1             | ×                 | ✓             | ✓            | ✓           | ✓                | ✓                          | ✓           | +++                 |
| Gender*                               | 4,224,842              | 40                | 6M         | 31 | 2F | 2M           | 12 | 2F | 1             | ×                 | ✓             | ✓            | ✓           | ✓                | ×                          | ×           | ++                  |
| Caucasian ethnicity                   | 1,266,818              | 9                 | 2          | 7  | 0  | 1            | 3  | 0  | 1             | ×                 | ✓             | ✓            | ✓           | ✓                | ×                          | ×           | ++                  |
| <b>Comorbidities</b>                  |                        |                   |            |    |    |              |    |    |               |                   |               |              |             |                  |                            |             |                     |
| More comorbidities                    | 4,213,584              | 32                | 20         | 10 | 0  | 11           | 12 | 0  | 1             | ×                 | ✓             | ✓            | ✓           | ✓                | ✓                          | ✓           | +++                 |
| Cardiovascular                        | 1,287,293              | 19                | 8          | 10 | 0  | 5            | 7  | 0  | 1             | ×                 | ×             | ✓            | ✓           | ✓                | ×                          | ×           | ++                  |
| Pulmonary                             | 1,345,420              | 16                | 6          | 9  | 0  | 3            | 6  | 0  | 1             | ×                 | ×             | ✓            | ✓           | ✓                | ×                          | ×           | ++                  |
| Neurological                          | 88,881                 | 11                | 1          | 8  | 1  | 1            | 4  | 0  | 1             | ×                 | ✓             | ✓            | ✓           | ✓                | ×                          | ×           | ++                  |
| ADL dependency                        | 4,261                  | 6                 | 4          | 1  | 0  | 2            | 3  | 0  | 1             | ×                 | ×             | ✓            | ✓           | ✓                | ×                          | ×           | +                   |
| Infection                             | 4,900                  | 7                 | 3          | 3  | 0  | 1            | 3  | 0  | 1             | ×                 | ×             | ✓            | ✓           | ✓                | ×                          | ×           | ++                  |
| Malignancy                            | 1,346,642              | 21                | 7          | 13 | 0  | 4            | 5  | 0  | 1             | ×                 | ✓             | ✓            | ✓           | ✓                | ×                          | ×           | ++                  |
| Chronic renal disease                 | 2,875,427              | 24                | 7          | 16 | 0  | 6            | 2  | 0  | 1             | ×                 | ✓             | ✓            | ✓           | ✓                | ×                          | ×           | ++                  |
| Liver disease                         | 1,343,798              | 11                | 2          | 8  | 0  | 2            | 3  | 0  | 1             | ×                 | ✓             | ✓            | ✓           | ✓                | ×                          | ×           | ++                  |
| Inflammatory bowel disease            | 79,856                 | 6                 | 1          | 4  | 1  | 1            | 1  | 1  | 1             | ×                 | ✓             | ✓            | ✓           | ✓                | ×                          | ×           | ++                  |
| Diabetes mellitus                     | 1,357,184              | 24                | 4          | 16 | 3  | 2            | 8  | 2  | 1             | ×                 | ✓             | ✓            | ✓           | ✓                | ×                          | ×           | ++                  |
| Immunocompromised                     | 95,665                 | 26                | 9          | 17 | 0  | 6            | 6  | 0  | 1             | ×                 | ✓             | ✓            | ✓           | ✓                | ×                          | ×           | ++                  |
| Under- or overweight~                 | 1,263,658              | 6                 | 1          | 6  | 0  | 1            | 2  | 0  | 1             | ×                 | ✓             | ✓            | ✓           | ✓                | ×                          | ×           | ++                  |
| <b>Medication</b>                     |                        |                   |            |    |    |              |    |    |               |                   |               |              |             |                  |                            |             |                     |
| Acid suppression/peptic ulcer disease | 83,876                 | 11                | 4          | 7  | 0  | 3            | 3  | 0  | 1             | ×                 | ×             | ✓            | ✓           | ✓                | ×                          | ×           | ++                  |
| PPIs                                  | 8,521                  | 17                | 3          | 14 | 0  | 0            | 4  | 0  | 1             | ×                 | ✓             | ✓            | ✓           | ✓                | ×                          | ×           | ++                  |
| H2 receptor antagonists               | 4,564                  | 9                 | 2          | 7  | 0  | 1            | 1  | 0  | 1             | ×                 | ✓             | ✓            | ✓           | ✓                | ×                          | ×           | ++                  |
| Antibiotic use¶                       | 11,985                 | 24                | 4          | 19 | 0  | 3            | 5  | 0  | 1             | ×                 | ✓             | ✓            | ✓           | ✓                | ×                          | ×           | ++                  |
| Fluoroquinolones                      | 4,053                  | 9                 | 1          | 8  | 0  | 0            | 2  | 0  | 1             | ×                 | ✓             | ✓            | ✓           | ✓                | ×                          | ×           | ++                  |
| Antiperistaltics                      | 2,559                  | 5                 | 0          | 5  | 0  | 0            | 0  | 0  | 1             | ×                 | ✓             | ✓            | ✓           | ✓                | ×                          | ×           | ++                  |
| <b>Recent medical history</b>         |                        |                   |            |    |    |              |    |    |               |                   |               |              |             |                  |                            |             |                     |
| Previous surgery                      | 10,433                 | 8                 | 2          | 6  | 0  | 1            | 1  | 0  | 1             | ×                 | ✓             | ✓            | ✓           | ✓                | ×                          | ×           | ++                  |
| Malnutrition/(par)enteral feeding     | 4,190                  | 8                 | 2          | 6  | 0  | 1            | 3  | 0  | 1             | ×                 | ✓             | ✓            | ✓           | ✓                | ×                          | ×           | ++                  |
| <b>CDI factors</b>                    |                        |                   |            |    |    |              |    |    |               |                   |               |              |             |                  |                            |             |                     |



|                                |           |    |    |    |   |   |    |   |   |   |   |   |   |   |   |   |    |
|--------------------------------|-----------|----|----|----|---|---|----|---|---|---|---|---|---|---|---|---|----|
| Healthcare facility associated | 13,677    | 30 | 10 | 20 | 0 | 2 | 10 | 0 | 1 | × | ✓ | ✓ | ✓ | × | × | × | +  |
| Community associated           | 3,093     | 6  | 1  | 5  | 0 | 0 | 1  | 0 | 1 | × | ✓ | ✓ | ✓ | ✓ | × | × | ++ |
| NAP1/027 strain                | 10,141    | 20 | 8  | 10 | 1 | 5 | 4  | 1 | 2 | × | × | ✓ | ✓ | ✓ | × | × | ++ |
| Binary toxin                   | 3,836     | 7  | 3  | 5  | 0 | 1 | 0  | 0 | 2 | ✓ | × | ✓ | ✓ | ✓ | × | × | ++ |
| Positive toxin EIA             | 9,642     | 9  | 6  | 3  | 0 | 3 | 2  | 0 | 1 | × | × | ✓ | ✓ | ✓ | × | × | ++ |
| Prior CDI (>3 months)          | 2,341     | 5  | 0  | 5  | 0 | 0 | 2  | 0 | 1 | × | ✓ | ✓ | ✓ | ✓ | × | × | ++ |
| Recurrent CDI (<3 months)      | 12,842    | 5  | 3  | 2  | 0 | 1 | 1  | 0 | 1 | × | × | ✓ | ✓ | ✓ | × | × | +  |
| <b>Laboratory values</b>       |           |    |    |    |   |   |    |   |   |   |   |   |   |   |   |   |    |
| Anemia                         | 6,121     | 9  | 4  | 5  | 0 | 2 | 3  | 0 | 1 | × | × | ✓ | ✓ | ✓ | × | × | +  |
| Thrombocytopenia               | 5,125     | 6  | 4  | 2  | 0 | 2 | 2  | 0 | 1 | × | × | ✓ | × | ✓ | × | × | +  |
| Electrolyte imbalance          | 1,263,366 | 3  | 3  | 0  | 0 | 1 | 2  | 0 | 1 | × | × | ✓ | ✓ | ✓ | × | × | +  |

**Table 1.** Potential prognostic factors for severe CDI. Phase, phase of investigation. For uni- and multivariate analyses: +, number of significant effects with a positive value; 0, number of non-significant effects; -, number of significant effects with a negative value. For GRADE factors: ✓, no serious limitations; ×, serious limitations (or not present for moderate/large effect size, dose effect); unclear, unable to rate item based on available information. For overall quality of evidence: +, very low; ++, low; +++, moderate; +++++, high.

\* M = male; F = female. In 4 studies male gender and in 2 studies female gender was identified as prognostic factor for severe CDI in univariate analysis. In multivariate analysis, 2 studies reported male gender and 2 studies reported female gender as risk factor of sCDI.

~ One study analyzed both under- and overweight as prognostic factors for sCDI; this study identified underweight but not overweight as risk factor for sCDI in uni- and multivariate analyses.

¶ Besides from antibiotic use (yes/no) prior to CDI diagnosis, none of the following separate antibiotic class was found to be predictive of sCDI: cephalosporins (n=7 studies), penicillins (n=4), macrolides (n=4), glycopeptides (n=3). Results for carbapenems were inconsistent with a tendency towards 'no effect' (n=8).

^ Publication bias is probable since most prognostic studies for sCDI are performed in hospitalized patients

# Seven studies assessed the presence of *C. difficile* binary toxin as prognostic factor for sCDI. Of these, one study contained two cohorts: in univariate analysis, binary toxin was associated with sCDI in one cohort, but not in the other cohort (121). Both results are reported in the results columns of the univariate analyses. Therefore, in this table the number of studies on binary toxin is 7, but the total number of univariate analyses is 8.

§ One large prospective study (Berry et al) and one small prospective study (López-Cárdenas) found binary toxin as risk factor for severe CDI and/or mortality; one large retrospective study (Carlson et al) found that the combination of binary toxin and eosinopenia was associated with mortality; two smaller prospective studies and two retrospective studies did not identify binary toxin as risk factor for sCDI.

## 204 Prognostic factors for recurrent CDI

205 The overall quality of evidence for the prognosis of recurrent CDI (rCDI) was low to moderate (**Table**  
206 **2**). The majority of studies was retrospective, with a high to moderate risk of bias.

207 *Higher age (≥65 years old)* is the most studied factor and was investigated in 35/43 included studies  
208 (9, 10, 12-15, 109, 111, 122, 123, 125, 126, 128, 130-134, 136-141, 143-153), 15/30 studies identified  
209 higher age as risk factor for rCDI in univariate analysis, and 16/31 studies in multivariable analysis.  
210 Moreover, higher age was the only factor for which we found a moderate to large effect size and a  
211 dose-dependent effect.

212 Eight studies assessed whether a *previous CDI recurrence in the preceding 3 months* was a risk factor  
213 for a subsequent rCDI, and showed inconsistent results (9, 10, 15, 111, 125, 133, 140, 145). Two  
214 prospective studies of higher quality found a clear association of previous recurrence with the risk of  
215 a subsequent rCDI (111, 140). Also, data of the pivotal trials on fidaxomicin and bezlotoxumab  
216 indicate that recurrence rates are higher in patients with any previous CDI episode or patients that  
217 fulfill criteria for rCDI (156-160). Since these trials are considered high quality studies, we have  
218 upgraded the level of evidence from low to moderate (Table 3). Finally, we consider two or more  
219 episodes of CDI as risk factor for a subsequent rCDI.

220 *Healthcare-acquired CDI* was associated with rCDI in univariate analyses of 5/10 studies, and in  
221 multivariable analyses of 2/4 studies (9, 14, 111, 125, 128, 141, 144, 145, 149, 150). This is also  
222 reflected by the correlation of *prior hospitalization (<3 months)* with a recurrent episode of CDI (13,  
223 15, 125, 128, 133, 138, 143, 149). The two largest cohort studies showed a significant association  
224 between prior hospitalization and rCDI in uni- and multivariable analysis (128, 149). Of note, one  
225 large cohort study reported a protective effect of community-acquired CDI for the development of  
226 rCDI (128).

227 *Proton pump inhibitor use* was studied in 23 included studies (9, 13, 14, 109, 122, 123, 130-135, 137,  
228 139, 141, 145, 147-151, 153, 155). The results show no clear association between PPIs and rCDI in  
229 univariate analyses, while in multivariable analyses there appears to be an association. Of note, some  
230 studies made a distinction between the moment PPI was started, i.e. prior to initial CDI episode or  
231 during/shortly after the initial episode (12, 13, 15, 123, 125, 146, 149, 155); PPI prescribed during or  
232 shortly after initial CDI appears to be associated with an increased risk of rCDI (effect found in 6/7  
233 studies in univariate analysis, and in 2/4 studies in multivariable analysis; low quality of evidence).

234 Eight studies reported on *non-CDI antibiotic use* after initial CDI diagnosis as a risk factor, but results  
235 were inconsistent (12, 123, 129, 136, 141, 145, 146, 148); 4/6 studies found an association between  
236 non-CDI antibiotic use and rCDI in univariate analysis, and 2/5 studies in multivariable analysis. A  
237 high-quality prospective study showed no significant association between antibiotic use and rCDI in  
238 both uni- and multivariate analysis (136). Several other studies investigated whether specific  
239 antibiotics that incited the primary CDI episode, were associated with recurrence; none of these  
240 antibiotic drugs was associated with rCDI. In conclusion, nor non-CDI antibiotic use prior to the  
241 primary CDI, nor concomitant non-CDI antibiotics used during the primary CDI episode, appeared to  
242 be convincing predictors for rCDI.

243 Although various definitions of sCDI are used in prognostic studies, most studies did not find severity  
244 of CDI to be a prognostic factor for rCDI (9, 123, 126, 131, 134, 140-142, 147, 150); 2/7 studies

245 identified sCDI as risk factor for rCDI in univariate analysis, and 2/4 in multivariable analysis. In the  
246 MODIFY trials, sCDI was a prespecified risk factor for recurrence, but in the placebo arm the  
247 recurrence rate was lower in the sCDI subgroup (22.4%) than in the non-CDI subgroup (27.5%) (158).  
248 Since we expected sCDI to be a risk factor for rCDI, re-assessment of included studies was performed  
249 by a third researcher (CV-G); this did not alter our results. In conclusion, we found insufficient  
250 evidence to consider sCDI a risk factor for rCDI.

251 Several studies investigated specific comorbidities, including chronic renal failure, diabetes mellitus,  
252 and cardiovascular disease as risk factors for rCDI (9, 12-15, 111, 122, 123, 125, 126, 128, 130-134,  
253 136, 138-154). Our review does not show any of these comorbidities to be clearly associated with an  
254 increased risk for rCDI. Even when combined into a robust score such as the Charlson Comorbidity  
255 Index, we did not identify a clear association (13, 65, 122, 130, 132-134, 140, 145, 146, 148, 150,  
256 152). Since results of the uni- and multivariable analyses of studies reporting in renal failure were  
257 conflicting, these studies were re-assessed by a third researcher. This led to identical findings.  
258 Immunocompromised status was a prespecified risk factor in the MODIFY trials; though in the  
259 placebo arm the recurrence rate in immunocompromised patients did not differ from that in  
260 immunocompetent patients (27.5% vs 26.6%) (158). A post-hoc analysis of the pivotal fidaxomicin  
261 trials investigated fever, leukocytosis and renal failure as prognostic markers, and identified renal  
262 failure as the only significant predictor for recurrence (RR, 1.45; 95% CI, 1.05–2.02). Overall, we  
263 found insufficient evidence to consider other comorbidities a risk factor for rCDI.

264 The ribotype 027 strain was not clearly associated with recurrence. However, only five studies  
265 reported on this ribotype as a possible risk factor (111, 123, 129, 145, 148); 2/5 studies found that  
266 the presence of a RT027 strain was associated with sCDI in univariate analysis, and only 1/3 studies in  
267 multivariable analysis. Since these results were inconsistent when compared to a previous systematic  
268 review, results were re-assessed by a third researcher (162). This reassessment did not result in  
269 different conclusions.

270 Laboratory parameters studied include white blood cell counts, and levels albumin, creatinine and C-  
271 reactive protein. None of these parameters was clearly associated with rCDI (10, 12-15, 111, 134,  
272 141, 144-147, 149).

273 Our findings show the use of probiotics as prophylaxis for CDI seemed to be associated with rCDI (13,  
274 14, 123, 133). However, this association is based on a small number of studies (n=4) and might be  
275 confounded by the fact that probiotics are started in patients with a high risk of rCDI and/or  
276 concomitant antibiotic use.

| Potential prognostic factor identified  | Number of participants | Number of studies | Univariate |    |   | Multivariable |   |   | GRADE factors |                   |               |              |             |                  |                            |             |                     |
|-----------------------------------------|------------------------|-------------------|------------|----|---|---------------|---|---|---------------|-------------------|---------------|--------------|-------------|------------------|----------------------------|-------------|---------------------|
|                                         |                        |                   | +          | 0  | - | +             | 0 | - | Phase         | Study limitations | Inconsistency | Indirectness | Imprecision | Publication bias | Moderate/large effect size | Dose effect | Quality of evidence |
| <b>Demographics</b>                     |                        |                   |            |    |   |               |   |   |               |                   |               |              |             |                  |                            |             |                     |
| Higher age                              | 52,312                 | 35                | 15         | 15 | 0 | 16            | 5 | 0 | 1             | ×                 | ×             | ✓            | ✓           | ✓                | ✓                          | ✓           | +++                 |
| Gender                                  | 7,074                  | 8                 | 0          | 7  | 0 | 0             | 1 | 0 | 1             | ×                 | ✓             | ✓            | ✓           | ✓                | ×                          | ×           | ++                  |
| <i>Male</i>                             | 15,769                 | 10                | 2          | 7  | 0 | 1             | 1 | 0 | 1             | ×                 | ✓             | ✓            | ✓           | ✓                | ×                          | ×           | ++                  |
| <i>Female</i>                           | 5,833                  | 12                | 2          | 9  | 0 | 1             | 2 | 0 | 1             | ×                 | ✓             | ✓            | ✓           | ✓                | ×                          | ×           | ++                  |
| Community-acquired CDI                  | 13,837                 | 7                 | 1          | 5  | 1 | 1             | 1 | 0 | 1             | ×                 | ✓             | ✓            | ✓           | ✓                | ×                          | ×           | ++                  |
| Hospital-acquired CDI                   | 10,468                 | 10                | 5          | 5  | 0 | 2             | 2 | 0 | 1             | ×                 | ×             | ✓            | ✓           | ✓                | ×                          | ×           | ++                  |
| Caucasian race                          | 13,335                 | 3                 | 2          | 1  | 0 | 1             | 0 | 0 | 1             | ×                 | ×             | ✓            | ✓           | ✓                | ×                          | ×           | +                   |
| <b>CDI factors</b>                      |                        |                   |            |    |   |               |   |   |               |                   |               |              |             |                  |                            |             |                     |
| Severe CDI                              | 8,796                  | 10                | 2          | 7  | 0 | 2             | 2 | 0 | 1             | ×                 | ✓             | ✓            | ×           | ✓                | ×                          | ×           | +                   |
| Ribotype 027 strain                     | 6,921                  | 5                 | 2          | 3  | 0 | 1             | 2 | 0 | 1             | ×                 | ×             | ✓            | ✓           | ✓                | ×                          | ×           | ++                  |
| Recurrent CDI episode (<3 months)       | 20,868                 | 8                 | 2          | 3  | 0 | 3             | 1 | 0 | 1             | ×                 | ×             | ✓            | ✓           | ✓                | ×                          | ×           | ++                  |
| <b>Comorbidities</b>                    |                        |                   |            |    |   |               |   |   |               |                   |               |              |             |                  |                            |             |                     |
| Charlson comorbidity index              | 30,045                 | 13                | 2          | 7  | 0 | 2             | 4 | 0 | 1             | ×                 | ✓             | ✓            | ✓           | ✓                | ×                          | ×           | ++                  |
| Cardiovascular (CHF/MI)                 | 20,160                 | 11                | 4          | 7  | 0 | 0             | 1 | 0 | 1             | ×                 | ✓             | ✓            | ×           | ✓                | ×                          | ×           | ++                  |
| Peripheral vascular disease             | 18,318                 | 6                 | 2          | 4  | 0 | 0             | 0 | 0 | 1             | ×                 | ×             | ✓            | ×           | ✓                | ×                          | ×           | +                   |
| Cerebrovascular (stroke)                | 17,785                 | 6                 | 2          | 4  | 0 | 0             | 0 | 0 | 1             | ×                 | ✓             | ✓            | ✓           | ✓                | ×                          | ×           | ++                  |
| (Chronic obstructive) Pulmonary disease | 19,908                 | 11                | 1          | 10 | 0 | 0             | 0 | 0 | 1             | ×                 | ✓             | ✓            | ✓           | ✓                | ×                          | ×           | ++                  |
| (Chronic) Renal disease/failure         | 26,440                 | 19                | 3          | 15 | 0 | 2             | 1 | 0 | 1             | ×                 | ✓             | ✓            | ✓           | ✓                | ×                          | ×           | +++                 |
| Diabetes mellitus                       | 20,745                 | 14                | 2          | 12 | 0 | 1             | 0 | 0 | 1             | ×                 | ✓             | ✓            | ✓           | ✓                | ×                          | ×           | +++                 |
| Liver disease                           | 14,378                 | 8                 | 0          | 8  | 0 | 0             | 0 | 0 | 1             | ×                 | ✓             | ✓            | ✓           | ✓                | ×                          | ×           | ++                  |
| Inflammatory bowel disease              | 13,977                 | 6                 | 3          | 3  | 0 | 1             | 2 | 0 | 1             | ×                 | ×             | ✓            | ✓           | ✓                | ×                          | ×           | ++                  |
| Dementia                                | 12,458                 | 5                 | 1          | 4  | 0 | 0             | 0 | 0 | 1             | ×                 | ×             | ✓            | ✓           | ✓                | ×                          | ×           | ++                  |
| Malignancy                              | 13,685                 | 10                | 0          | 10 | 0 | 0             | 0 | 0 | 1             | ×                 | ✓             | ✓            | ✓           | ✓                | ×                          | ×           | ++                  |
| <i>Solid malignancy</i>                 | 10,078                 | 4                 | 1          | 3  | 0 | 0             | 0 | 0 | 1             | ×                 | ✓             | ✓            | ✓           | ✓                | ×                          | ×           | +                   |
| <b>Hospital admission factors</b>       |                        |                   |            |    |   |               |   |   |               |                   |               |              |             |                  |                            |             |                     |
| Prior hospitalization (<3 months)       | 31,952                 | 8                 | 5          | 2  | 0 | 2             | 2 | 0 | 1             | ×                 | ×             | ✓            | ✓           | ✓                | ×                          | ×           | ++                  |
| Requirement of ICU admission            | 28,356                 | 8                 | 2          | 4  | 0 | 0             | 3 | 0 | 1             | ×                 | ✓             | ✓            | ✓           | ✓                | ×                          | ×           | ++                  |
| Increased length of stay (>10 days)     | 2,464                  | 5                 | 3          | 2  | 0 | 1             | 2 | 0 | 1             | ×                 | ×             | ✓            | ✓           | ✓                | ×                          | ×           | +                   |
| <b>Medication</b>                       |                        |                   |            |    |   |               |   |   |               |                   |               |              |             |                  |                            |             |                     |
| Concomitant non-CDI AB                  | 7,980                  | 8                 | 2          | 4  | 0 | 2             | 3 | 0 | 1             | ×                 | ×             | ✓            | ✓           | ✓                | ×                          | ×           | +                   |
| Proton pump inhibitor                   | 43,653                 | 23                | 6          | 14 | 1 | 8             | 3 | 1 | 1             | ×                 | ×             | ✓            | ✓           | ✓                | ×                          | ×           | ++                  |
| <i>PPI prior to CDI</i>                 | 14,308                 | 5                 | 2          | 3  | 0 | 0             | 0 | 0 | 1             | ×                 | ×             | ✓            | ✓           | ✓                | ×                          | ×           | +                   |
| <i>PPI during/after CDI</i>             | 11,785                 | 7                 | 6          | 1  | 0 | 2             | 2 | 0 | 1             | ×                 | ✓             | ✓            | ✓           | ✓                | ×                          | ×           | ++                  |
| H2 receptor antagonist                  | 29,998                 | 5                 | 2          | 2  | 0 | 2             | 1 | 0 | 1             | ×                 | ✓             | ✓            | ✓           | ✓                | ×                          | ×           | ++                  |
| Steroids / immunosuppression            | 11,429                 | 10                | 3          | 6  | 0 | 2             | 3 | 0 | 1             | ×                 | ✓             | ✓            | ✓           | ✓                | ×                          | ×           | ++                  |

|                          |        |    |   |    |   |   |   |   |   |   |   |   |   |   |   |   |     |
|--------------------------|--------|----|---|----|---|---|---|---|---|---|---|---|---|---|---|---|-----|
| Probiotics               | 29,847 | 4  | 3 | 0  | 0 | 2 | 1 | 0 | 1 | × | ✓ | ✓ | ✓ | ✓ | × | × | ++  |
| Chemotherapy             | 20,494 | 8  | 0 | 7  | 0 | 1 | 1 | 0 | 1 | × | ✓ | ✓ | ✓ | ✓ | × | × | ++  |
| Parenteral feeding       | 2,988  | 7  | 1 | 6  | 0 | 0 | 0 | 0 | 1 | × | ✓ | ✓ | ✓ | × | × | × | +   |
| <b>Inciting AB</b>       |        |    |   |    |   |   |   |   |   |   |   |   |   |   |   |   |     |
| Aminopenicilin           | 10,435 | 5  | 1 | 4  | 0 | 0 | 0 | 0 | 1 | × | ✓ | ✓ | ✓ | ✓ | × | × | ++  |
| Cephalosporin            | 4,086  | 4  | 0 | 4  | 0 | 0 | 0 | 0 | 1 | × | ✓ | ✓ | ✓ | ✓ | × | × | ++  |
| Fluorquinolones          | 15,657 | 12 | 3 | 9  | 0 | 2 | 0 | 0 | 1 | × | ✓ | ✓ | ✓ | ✓ | × | × | ++  |
| Aminoglycoside           | 10,271 | 4  | 1 | 3  | 0 | 0 | 0 | 0 | 1 | × | ✓ | ✓ | ✓ | ✓ | × | × | ++  |
| Clindamycin              | 10,679 | 5  | 2 | 3  | 0 | 1 | 0 | 0 | 1 | × | × | ✓ | ✓ | ✓ | × | × | +   |
| Macrolide                | 10,435 | 5  | 1 | 4  | 0 | 0 | 0 | 0 | 1 | × | ✓ | ✓ | ✓ | ✓ | × | × | ++  |
| Carbapenem/meropenem     | 9,938  | 7  | 0 | 7  | 0 | 0 | 0 | 0 | 1 | × | ✓ | ✓ | ✓ | ✓ | × | × | ++  |
| <b>Laboratory values</b> |        |    |   |    |   |   |   |   |   |   |   |   |   |   |   |   |     |
| Leukocytes (mean/peak)   | 22,954 | 17 | 6 | 10 | 0 | 1 | 3 | 0 | 1 | × | ✓ | ✓ | ✓ | ✓ | × | × | ++  |
| Albumin (mean/low)       | 18,737 | 12 | 4 | 8  | 0 | 1 | 2 | 0 | 1 | × | ✓ | ✓ | ✓ | ✓ | × | × | ++  |
| Creatinine (mean/peak)   | 19,651 | 14 | 1 | 12 | 0 | 1 | 2 | 0 | 1 | × | ✓ | ✓ | ✓ | ✓ | × | × | +++ |
| C-reactive protein       | 9,805  | 5  | 2 | 2  | 0 | 0 | 0 | 0 | 1 | × | × | ✓ | ✓ | ✓ | × | × | +   |
| <b>Symptoms</b>          |        |    |   |    |   |   |   |   |   |   |   |   |   |   |   |   |     |
| Fever                    | 3,740  | 9  | 3 | 6  | 0 | 2 | 0 | 0 | 1 | × | ✓ | ✓ | ✓ | ✓ | × | × | ++  |
| Abdominal pain           | 5,756  | 5  | 2 | 3  | 0 | 0 | 0 | 0 | 1 | × | × | ✓ | ✓ | ✓ | × | × | +   |

**Table 2.** Potential prognostic factors for recurrent CDI. Phase, phase of investigation. For uni- and multivariate analyses: +, number of significant effects with a positive value; 0, number of non-significant effects; -, number of significant effects with a negative value. For GRADE factors: ✓, no serious limitations; ✗, serious limitations (or not present for moderate/large effect size, dose effect); unclear, unable to rate item based on available information. For overall quality of evidence: +, very low; ++, low; +++, moderate; +++++, high

| Prognostic factor                                                | Quality of evidence |
|------------------------------------------------------------------|---------------------|
| <i>Severe CDI</i>                                                |                     |
| <b>Higher age (&gt;65-70 years old)</b>                          | moderate            |
| <b>Presence of multiple comorbidities</b>                        | moderate            |
| <i>Recurrent CDI</i>                                             |                     |
| <b>Higher age (&gt;65-70 years old)</b>                          | moderate            |
| <b>Previous recurrence of CDI (&lt;3 months)</b>                 | moderate            |
| <b>Healthcare-associated CDI</b>                                 | low                 |
| <b>Prior hospitalization (&lt;3 months)</b>                      | low                 |
| <b>Proton pump inhibitors started during/after CDI diagnosis</b> | low                 |

277 **Table 3.** Summary of findings

## 278 Conclusions

279 In this systematic review, we applied the GRADE methodology to weigh the evidence on prognostic  
 280 factors for sCDI and rCDI (37). We found that the most important risk factors for sCDI were higher  
 281 age ( $\geq 65$ -70 years old) and presence of multiple comorbidities. Higher age was also a prognostic  
 282 factor for rCDI. Other factors associated with an increased risk of rCDI were the acquisition of CDI as  
 283 a healthcare-associated infection and prior hospitalization and the start of PPIs during/after CDI  
 284 diagnosis. The evidence for having a previous recurrence of CDI as risk factor for rCDI was less strong.

285 Our systematic review on prognostic factors resulted in several expected and unexpected findings  
 286 when compared with previous reviews rCDI (162-164). Our findings are in line with two recently  
 287 published systematic reviews on predictors of sCDI that reported age and presence of comorbidities  
 288 as the two most important severity predictors for CDI (162, 165). Similarly, previous reviews on  
 289 prognostic factors for rCDI found that older age, prior CDI and PPI therapy were risk factors for rCDI  
 290 (162-165). However, PPI therapy in general did not show a clear association in our study.

291 In contrast, we could not clearly identify several previously reported risk factors for sCDI or rCDI, such  
 292 as infection caused by a ribotype 027/NAP1 strain, antibiotic use, PPI use prior to CDI diagnosis, and  
 293 the presence of chronic or end-stage renal disease (162, 163). One possible explanation might be  
 294 that many reviews excluded studies reporting solely univariate analyses. This might lead to an  
 295 overestimation of the effect of certain prognostic factors, since many studies only include variables  
 296 with a significant association in univariate analysis in their multivariable analysis. Another  
 297 explanation for our findings might be index event bias: this bias arises in studies that select patients  
 298 based on the occurrence of an index event, and can lead to 'negative' or even paradoxical findings in  
 299 recurrence risk research (166). Here, we found that chronic renal failure did not appear to be  
 300 associated with rCDI. Previous research shows that patients with kidney failure are prone to  
 301 developing a primary CDI, but the direct association between kidney disease and rCDI is less clear  
 302 (163, 167). Since reviews on rCDI select studies based on the occurrence of a primary CDI, this might  
 303 explain why renal disease is not a strong predictor of rCDI in previous reviews, and not a significant  
 304 risk factor in the current review.

305 Finally, when studying IBD as prognostic factor for sCDI/rCDI, another difficulty in interpretation  
306 arises, since symptoms of IBD are similar to those of CDI. Furthermore, patients with IBD are at  
307 higher risk of CDI and infection and colonization with *C. difficile* can induce an exacerbation of IBD  
308 (168). Also, diagnostic tests do not always allow to differentiate between *C. difficile* infection or  
309 colonization. Many clinicians pragmatically start antibiotic treatment in IBD patients without  
310 endoscopy. Subsequent false-positive CDI diagnoses may contribute to an overestimation of CDI  
311 (recurrence) risk. Aforementioned factors may have contributed to differences between the results  
312 of our current review and previous publications.

313 Our review has several strengths. First, we used a broad search strategy and included a large number  
314 of studies, minimizing the risk of missing data. Second, articles were selected based on strict  
315 predefined criteria by two independent researchers (TvR and RO). Third, the quality of the studies  
316 was judged by the structured prognostic GRADE approach. To our knowledge this approach has not  
317 been previously used for prognostic factors for sCDI and rCDI. Also, we reported results of both uni-  
318 and multivariable analyses. When results of the uni- and multivariable analyses of different studies  
319 were conflicting, we acknowledged this disparity and results were re-assessed by a third researcher.  
320 Reassessment was performed on the studies reporting the presence of RT027 strain, sCDI and renal  
321 disease as possible risk factors for rCDI, but this did not result in different conclusions. Finally, some  
322 disparity can be explained by the large number of studies where non-significant univariate prognostic  
323 factors were not included in the multivariate models.

324 A limitation is the generally low quality of available studies. Most studies have not performed a  
325 sample size calculation, allowing for possible type I and type II statistical errors. As many studies  
326 were retrospective, it was not always clear whether certain factors were already present before the  
327 occurrence of sCDI/rCDI (i.e. truly prognostic factors) or whether they co-existed. A second important  
328 limitation is the subjectivity how to weight different quality studies, which also resulted in  
329 stimulating discussions in our working group.

330 Identifying prognostic factors for sCDI and rCDI could aid clinicians to make an optimal treatment  
331 decision to reduce the risk of recurrent disease and decrease CDI complications. The findings of this  
332 review are especially relevant for rCDI: a risk stratification strategy may allow for selective use of  
333 more expensive novel treatments with less risk of recurrence. To implement risk stratification of in  
334 clinical practice, simple risk tools are needed. Currently, several prediction models or risk scores for  
335 sCDI and rCDI have been developed (9-30). However, none has gained widespread clinical  
336 implementation. Based on the low quality of the studies and small effects of identified prognostic  
337 factors, it is not surprising that validation of prediction tools in external cohorts show disappointing  
338 results (169-171). Additional explanations are the heterogeneity and multimorbidity of the CDI  
339 population and variation in study setting, diagnostic criteria and CDI treatment regimens. The  
340 current review may be used as starting point for the development of a risk tool with a better  
341 performance in the overall CDI population. We suggest that future clinical trials on CDI treatment use  
342 standardized definitions for recurrence and severity and systematically collect and report the risk  
343 factors that we have discussed in this review, to allow for meaningful meta-analysis on risk factors  
344 using data of high-quality trials.

345 In conclusion, our approach identified higher age and the presence of multiple comorbidities as  
346 prognostic factors for sCDI. The only identified risk factors for rCDI were higher age, healthcare-  
347 associated CDI, prior hospitalization (<3 months), PPIs started during/after CDI diagnosis and rCDI.

348 Some variables that were found as risk factors for sCDI/rCDI in previous reviews, were not confirmed  
349 in the current review, which can be attributed to differences in methodology. Risk stratification for  
350 sCDI/rCDI may contribute to a more personalized and optimal treatment for patients with CDI.

## 351 Transparency declaration

### 352 Conflict of interest disclosures, funding

353 TvR was supported by Netherlands Organization for Health Research and Development (ZonMw)  
354 grant *Goed Gebruik Geneesmiddelen*, project number 848016009. JK and EK received a research  
355 grant from Vedanta Biosciences (Boston, USA). The funders had no role in study design, data  
356 collection and interpretation, or the decision to submit the work for publication. All other authors: no  
357 conflicts of interest to disclose.

### 358 Contribution

359 JP and EK conceived the study on behalf of the *ESCMID Study Group for Clostridioides difficile*  
360 (ESGCD). JP designed the search strategy. TvR and RO selected the studies and acquired the data.  
361 TvR, RO, CV-G and JK graded selected studies. TvR, RO and OD analyzed the data. TvR and RO drafted  
362 the manuscript. All authors critically revised the manuscript and approved the final version.

## 363 References

- 364 1. Lessa FC, Mu Y, Bamberg WM, Beldavs ZG, Dumyati GK, Dunn JR, et al. Burden of *Clostridium*  
365 *difficile* infection in the United States. *N Engl J Med*. 2015;372(9):825-34.
- 366 2. McDonald LC, Gerding DN, Johnson S, Bakken JS, Carroll KC, Coffin SE, et al. Clinical Practice  
367 Guidelines for *Clostridium difficile* Infection in Adults and Children: 2017 Update by the Infectious  
368 Diseases Society of America (IDSA) and Society for Healthcare Epidemiology of America (SHEA). *Clin*  
369 *Infect Dis*. 2018;66(7):987-94.
- 370 3. Debast SB, Bauer MP, Kuijper EJ, European Society of Clinical M, Infectious D. European  
371 Society of Clinical Microbiology and Infectious Diseases: update of the treatment guidance document  
372 for *Clostridium difficile* infection. *Clin Microbiol Infect*. 2014;20 Suppl 2:1-26.
- 373 4. Ooijsaar RE, van Beurden YH, Terveer EM, Goorhuis A, Bauer MP, Keller JJ, et al. Update of  
374 treatment algorithms for *Clostridium difficile* infection. *Clinical microbiology and infection : the*  
375 *official publication of the European Society of Clinical Microbiology and Infectious Diseases*.  
376 2018;24(5):452-62.
- 377 5. Beinortas T, Burr NE, Wilcox MH, Subramanian V. Comparative efficacy of treatments for  
378 *Clostridium difficile* infection: a systematic review and network meta-analysis. *Lancet Infect Dis*.  
379 2018;18(9):1035-44.
- 380 6. Wilcox MH, Gerding DN, Poxton IR, Kelly C, Nathan R, Birch T, et al. Bezlotoxumab for  
381 Prevention of Recurrent *Clostridium difficile* Infection. *N Engl J Med*. 2017;376(4):305-17.
- 382 7. Ianiro G, Masucci L, Quaranta G, Simonelli C, Rizzatti G, Lopetuso L, et al. Randomized Clinical  
383 Trial: Single-Infusion Fmt Versus Multiple-Infusion Fmt for the Treatment of Severe *C. Difficile*  
384 Infection. *Digest Liver Dis*. 2018;50(2):E66-E7.
- 385 8. van Nood E, Vrieze A, Nieuwdorp M, Fuentes S, Zoetendal EG, de Vos WM, et al. Duodenal  
386 infusion of donor feces for recurrent *Clostridium difficile*. *N Engl J Med*. 2013;368(5):407-15.
- 387 9. Cobo J, Merino E, Martinez C, Cozar-Lliso A, Shaw E, Marrodan T, et al. Prediction of  
388 recurrent *clostridium difficile* infection at the bedside: the GEIH-CDI score. *Int J Antimicrob Agents*.  
389 2018;51(3):393-8.
- 390 10. D'Agostino RB, Sr., Collins SH, Pencina KM, Kean Y, Gorbach S. Risk estimation for recurrent  
391 *Clostridium difficile* infection based on clinical factors. *Clin Infect Dis*. 2014;58(10):1386-93.



- 392 11. Zilberberg MD, Reske K, Olsen M, Yan Y, Dubberke ER. Development and validation of a  
393 recurrent *Clostridium difficile* risk-prediction model. *J Hosp Med*. 2014;9(7):418-23.
- 394 12. Larrainzar-Coghen T, Rodriguez-Pardo D, Puig-Asensio M, Rodriguez V, Ferrer C, Bartolome R,  
395 et al. First recurrence of *Clostridium difficile* infection: clinical relevance, risk factors, and prognosis.  
396 *European journal of clinical microbiology & infectious diseases* : official publication of the European  
397 Society of Clinical Microbiology. 2016;35(3):371-8.
- 398 13. Reveles KR, Mortensen EM, Koeller JM, Lawson KA, Pugh MJV, Rumbellow SA, et al.  
399 Derivation and Validation of a *Clostridium difficile* Infection Recurrence Prediction Rule in a National  
400 Cohort of Veterans. *Pharmacotherapy*. 2018;38(3):349-56.
- 401 14. Viswesh V, Hincapie AL, Yu M, Khatchatourian L, Nowak MA. Development of a bedside  
402 scoring system for predicting a first recurrence of *Clostridium difficile*-associated diarrhea. *Am J*  
403 *Health Syst Pharm*. 2017;74(7):474-82.
- 404 15. Hebert C, Du H, Peterson LR, Robicsek A. Electronic health record-based detection of risk  
405 factors for *Clostridium difficile* infection relapse. *Infect Control Hosp Epidemiol*. 2013;34(4):407-14.
- 406 16. LaBarbera FD, Nikiforov I, Parvathenani A, Pramil V, Gorrepati S. A prediction model for  
407 *Clostridium difficile* recurrence. *J Community Hosp Intern Med Perspect*. 2015;5(1):26033.
- 408 17. Hu MY, Katchar K, Kyne L, Maroo S, Tummala S, Dreisbach V, et al. Prospective derivation and  
409 validation of a clinical prediction rule for recurrent *Clostridium difficile* infection. *Gastroenterology*.  
410 2009;136(4):1206-14.
- 411 18. Abou Chakra CN, Pepin J, Valiquette L. Prediction tools for unfavourable outcomes in  
412 *Clostridium difficile* infection: a systematic review. *PloS one*. 2012;7(1):e30258.
- 413 19. Arora V, Kachroo S, Ghantaji SS, Dupont HL, Garey KW. High Horn's index score predicts poor  
414 outcomes in patients with *Clostridium difficile* infection. *The Journal of hospital infection*.  
415 2011;79(1):23-6.
- 416 20. Bhangu S, Bhangu A, Nightingale P, Michael A. Mortality and risk stratification in patients  
417 with *Clostridium difficile*-associated diarrhoea. *Colorectal disease : the official journal of the*  
418 *Association of Coloproctology of Great Britain and Ireland*. 2010;12(3):241-6.
- 419 21. Butt E, Foster JA, Keedwell E, Bell JE, Titball RW, Bhangu A, et al. Derivation and validation of  
420 a simple, accurate and robust prediction rule for risk of mortality in patients with *Clostridium difficile*  
421 infection. *BMC Infect Dis*. 2013;13:316.
- 422 22. Drew RJ, Boyle B. RUWA scoring system: a novel predictive tool for the identification of  
423 patients at high risk for complications from *Clostridium difficile* infection. *The Journal of hospital*  
424 *infection*. 2009;71(1):93-4; author reply 4-5.
- 425 23. Hensgens MP, Dekkers OM, Goorhuis A, LeCessie S, Kuijper EJ. Predicting a complicated  
426 course of *Clostridium difficile* infection at the bedside. *Clin Microbiol Infect*. 2014;20(5):O301-8.
- 427 24. Lungulescu OA, Cao W, Gatskevich E, Tlhabano L, Stratidis JG. CSI: a severity index for  
428 *Clostridium difficile* infection at the time of admission. *The Journal of hospital infection*.  
429 2011;79(2):151-4.
- 430 25. Na X, Martin AJ, Sethi S, Kyne L, Garey KW, Flores SW, et al. A Multi-Center Prospective  
431 Derivation and Validation of a Clinical Prediction Tool for Severe *Clostridium difficile* Infection. *PloS*  
432 *one*. 2015;10(4):e0123405.
- 433 26. Rubin MS, Bodenstern LE, Kent KC. Severe *Clostridium difficile* colitis. *Diseases of the colon*  
434 *and rectum*. 1995;38(4):350-4.
- 435 27. Valiquette L, Pépin J, Do XV, Nault V, Beaulieu AA, Bédard J, et al. Prediction of complicated  
436 *Clostridium difficile* infection by pleural effusion and increased wall thickness on computed  
437 tomography. *Clin Infect Dis*. 2009;49(4):554-60.
- 438 28. Velazquez-Gomez I, Rocha-Rodriguez R, Toro DH, Gutierrez-Nuñez JJ, Gonzalez G, Saavedra S.  
439 A Severity Score Index for *Clostridium difficile* Infection. *Infectious Diseases in Clinical Practice*.  
440 2008;16(6):376-8.
- 441 29. Welfare MR, Lalayiannis LC, Martin KE, Corbett S, Marshall B, Sarma JB. Co-morbidities as  
442 predictors of mortality in *Clostridium difficile* infection and derivation of the ARC predictive score.  
443 *The Journal of hospital infection*. 2011;79(4):359-63.

- 444 30. Zilberberg MD, Shorr AF, Micek ST, Doherty JA, Kollef MH. Clostridium difficile-associated  
445 disease and mortality among the elderly critically ill. *Critical care medicine*. 2009;37(9):2583-9.
- 446 31. Bauer MP, Kuijper EJ, van Dissel JT, European Society of Clinical M, Infectious D. European  
447 Society of Clinical Microbiology and Infectious Diseases (ESCMID): treatment guidance document for  
448 Clostridium difficile infection (CDI). *Clin Microbiol Infect*. 2009;15(12):1067-79.
- 449 32. J. van Prehn ER, E.H. Vogelzang, E. Bouza, A. Hristea, B. Guery, M. Krutova, T. Norén, F.  
450 Allerberger, J. Coia, A. Goorhuis, T. M. van Rossen, R.E. Ooijselaar, K. Burns, B.R. Scharvik Olesen, S.  
451 Tschudin-Sutter, M. H. Wilcox, M. Vehreschild, F. Fitzpatrick, E.J. Kuijper. European Society of Clinical  
452 Microbiology and Infectious Diseases: 2021 update on the treatment guidance document for  
453 Clostridioides difficile infection in adults. submitted to the ESCMID for (public) approval. 2021.
- 454 33. McDonald LC, Gerding DN, Johnson S, Bakken JS, Carroll KC, Coffin SE, et al. Clinical Practice  
455 Guidelines for Clostridium difficile Infection in Adults and Children: 2017 Update by the Infectious  
456 Diseases Society of America (IDSA) and Society for Healthcare Epidemiology of America (SHEA).  
457 *Clinical infectious diseases : an official publication of the Infectious Diseases Society of America*.  
458 2018;66(7):e1-e48.
- 459 34. Surawicz CM, Brandt LJ, Binion DG, Ananthakrishnan AN, Curry SR, Gilligan PH, et al.  
460 Guidelines for diagnosis, treatment, and prevention of Clostridium difficile infections. *Am J*  
461 *Gastroenterol*. 2013;108(4):478-98; quiz 99.
- 462 35. Kuijper EJ, Coignard B, Tull P, difficile ESGfC, States EUM, European Centre for Disease P, et  
463 al. Emergence of Clostridium difficile-associated disease in North America and Europe. *Clin Microbiol*  
464 *Infect*. 2006;12 Suppl 6:2-18.
- 465 36. Hayden JA, van der Windt DA, Cartwright JL, Cote P, Bombardier C. Assessing bias in studies  
466 of prognostic factors. *Ann Intern Med*. 2013;158(4):280-6.
- 467 37. Huguet A, Hayden JA, Stinson J, McGrath PJ, Chambers CT, Tougas ME, et al. Judging the  
468 quality of evidence in reviews of prognostic factor research: adapting the GRADE framework. *Syst*  
469 *Rev*. 2013;2:71.
- 470 38. Alicino C, Giacobbe DR, Durando P, Bellina D, AM DIB, Paganino C, et al. Increasing incidence  
471 of Clostridium difficile infections: results from a 5-year retrospective study in a large teaching  
472 hospital in the Italian region with the oldest population. *Epidemiology and infection*.  
473 2016;144(12):2517-26.
- 474 39. Ananthakrishnan AN, Guzman-Perez R, Gainer V, Cai T, Churchill S, Kohane I, et al. Predictors  
475 of severe outcomes associated with Clostridium difficile infection in patients with inflammatory  
476 bowel disease. *Alimentary pharmacology & therapeutics*. 2012;35(7):789-95.
- 477 40. Andrews CN, Rouboud J, Kassen BO, Enns R. Clostridium difficile-associated diarrhea:  
478 predictors of severity in patients presenting to the emergency department. *Canadian journal of*  
479 *gastroenterology = Journal canadien de gastroenterologie*. 2003;17(6):369-73.
- 480 41. Archbald-Pannone LR, McMurry TL, Guerrant RL, Warren CA. Delirium and other clinical  
481 factors with Clostridium difficile infection that predict mortality in hospitalized patients. *American*  
482 *journal of infection control*. 2015;43(7):690-3.
- 483 42. Atamna A, Yahav D, Eliakim-Raz N, Goldberg E, Ben-Zvi H, Barsheshet A, et al. The effect of  
484 statins on the outcome of Clostridium difficile infection in hospitalized patients. *European Journal of*  
485 *Clinical Microbiology and Infectious Diseases*. 2016;35(5):779-84.
- 486 43. Barker AK, Van Galen A, Sethi AK, Shirley D, Safdar N. Tobacco use as a screener for  
487 Clostridium difficile infection outcomes. *The Journal of hospital infection*. 2018;98(1):36-9.
- 488 44. Bauer KA, Johnston JEW, Wenzler E, Goff DA, Cook CH, Balada-Llasat JM, et al. Impact of the  
489 NAP-1 strain on disease severity, mortality, and recurrence of healthcare-associated Clostridium  
490 difficile infection. *Anaerobe*. 2017;48:1-6.
- 491 45. Berry CE, Davies KA, Owens DW, Wilcox MH. Is there a relationship between the presence of  
492 the binary toxin genes in Clostridium difficile strains and the severity of C. difficile infection (CDI)?  
493 *European journal of clinical microbiology & infectious diseases : official publication of the European*  
494 *Society of Clinical Microbiology*. 2017;36(12):2405-15.

- 495 46. Boone JH, Archbald-Pannone LR, Wickham KN, Carman RJ, Guerrant RL, Franck CT, et al.  
496 Ribotype 027 *Clostridium difficile* infections with measurable stool toxin have increased lactoferrin  
497 and are associated with a higher mortality. *European journal of clinical microbiology & infectious*  
498 *diseases : official publication of the European Society of Clinical Microbiology*. 2014;33(6):1045-51.
- 499 47. Caupenne A, Ingrand P, Ingrand I, Forestier E, Roubaud-Baudron C, Gavazzi G, et al. Acute  
500 *Clostridioides difficile* Infection in Hospitalized Persons Aged 75 and Older: 30-Day Prognosis and Risk  
501 Factors for Mortality. *Journal of the American Medical Directors Association*. 2019.
- 502 48. Charilaou P, Devani K, John F, Kanna S, Ahlawat S, Young M, et al. Acute kidney injury impact  
503 on inpatient mortality in *Clostridium difficile* infection: A national propensity-matched study. *Journal*  
504 *of gastroenterology and hepatology*. 2018;33(6):1227-33.
- 505 49. Chintanaboina J, Navabi S, Suchniak-Mussari K, Stern B, Bedi S, Lehman EB, et al. Predictors  
506 of 30-Day Mortality in Hospitalized Patients with *Clostridium difficile* Infection. *SouthMedJ*.  
507 2017;110(8):546-9.
- 508 50. Clohessy P, Merif J, Post JJ. Severity and frequency of community-onset *Clostridium difficile*  
509 infection on an Australian tertiary referral hospital campus. *International Journal of Infectious*  
510 *Diseases*. 2014;29:152-5.
- 511 51. Cohen NA, Miller T, Na'aminh W, Hod K, Adler A, Cohen D, et al. *Clostridium difficile* fecal  
512 toxin level is associated with disease severity and prognosis. *United European gastroenterology*  
513 *journal*. 2018;6(5):773-80.
- 514 52. Das R, Feuerstadt P, Brandt LJ. Glucocorticoids are associated with increased risk of short-  
515 term mortality in hospitalized patients with *clostridium difficile*-associated disease. *Am J*  
516 *Gastroenterol*. 2010;105(9):2040-9.
- 517 53. De Francesco MA, Lorenzin G, Piccinelli G, Corbellini S, Bonfanti C, Caruso A. Correlation  
518 between *tcdB* gene PCR cycle threshold and severe *Clostridium difficile* disease. *Anaerobe*.  
519 2019;59:141-4.
- 520 54. Dudukgian H, Sie E, Gonzalez-Ruiz C, Etzioni DA, Kaiser AM. *C. difficile* colitis--predictors of  
521 fatal outcome. *Journal of gastrointestinal surgery : official journal of the Society for Surgery of the*  
522 *Alimentary Tract*. 2010;14(2):315-22.
- 523 55. Figh ML, Zoog ESL, Moore RA, Dart BWt, Heath G, Butler RM, et al. External Validation of  
524 Velazquez-Gomez Severity Score Index and ATLAS Scores and the Identification of Risk Factors  
525 Associated with Mortality in *Clostridium difficile* Infections. *The American surgeon*.  
526 2017;83(12):1347-51.
- 527 56. Fountain EM, Moses MC, Park LP, Woods CW, Arepally GM. Thrombocytopenia in  
528 hospitalized patients with severe *clostridium difficile* infection. *Journal of thrombosis and*  
529 *thrombolysis*. 2017;43(1):38-42.
- 530 57. Fujii L, Fasolino J, Crowell MD, Dibaise JK. Appendectomy and risk of *clostridium difficile*  
531 recurrence. *Infectious Diseases in Clinical Practice*. 2013;21(1):28-32.
- 532 58. Hanania A, Jiang ZD, Smiley C, Lasco T, Garey KW, DuPont HL. Fecal calprotectin in the  
533 diagnosis of *clostridium difficile* infection. *Infectious Diseases in Clinical Practice*. 2016;24(1):31-4.
- 534 59. Henrich TJ, Krakower D, Bitton A, Yokoe DS. Clinical risk factors for severe *Clostridium*  
535 *difficile*-associated disease. *Emerging infectious diseases*. 2009;15(3):415-22.
- 536 60. Hubert B, Loo VG, Bourgault AM, Poirier L, Dascal A, Fortin E, et al. A portrait of the  
537 geographic dissemination of the *Clostridium difficile* North American pulsed-field type 1 strain and  
538 the epidemiology of *C. difficile*-associated disease in Quebec. *Clin Infect Dis*. 2007;44(2):238-44.
- 539 61. Huttunen R, Vuento R, Syrjanen J, Tissari P, Aittoniemi J. Case fatality associated with a  
540 hypervirulent strain in patients with culture-positive *Clostridium difficile* infection: a retrospective  
541 population-based study. *International journal of infectious diseases : IJID : official publication of the*  
542 *International Society for Infectious Diseases*. 2012;16(7):e532-5.
- 543 62. Kassam Z, Cribb Fabersunne C, Smith MB, Alm EJ, Kaplan GG, Nguyen GC, et al. *Clostridium*  
544 *difficile* associated risk of death score (CARDS): a novel severity score to predict mortality among  
545 hospitalised patients with *C. difficile* infection. *Alimentary pharmacology & therapeutics*.  
546 2016;43(6):725-33.

- 547 63. Kenneally C, Rosini JM, Skrupky LP, Doherty JA, Hollands JM, Martinez E, et al. Analysis of 30-  
548 day mortality for clostridium difficile-associated disease in the ICU setting. *Chest*. 2007;132(2):418-  
549 24.
- 550 64. Khanafer N, Barbut F, Eckert C, Perraud M, Demont C, Luxemburger C, et al. Factors  
551 predictive of severe Clostridium difficile infection depend on the definition used. *Anaerobe*.  
552 2016;37:43-8.
- 553 65. Khanna S, Pardi DS, Aronson SL, Kammer PP, Orenstein R, St Sauver JL, et al. The  
554 epidemiology of community-acquired Clostridium difficile infection: a population-based study. *Am J*  
555 *Gastroenterol*. 2012;107(1):89-95.
- 556 66. Khanna S, Gupta A, Baddour LM, Pardi DS. Epidemiology, outcomes, and predictors of  
557 mortality in hospitalized adults with Clostridium difficile infection. *Internal and emergency medicine*.  
558 2016;11(5):657-65.
- 559 67. Khanna S, Keddis MT, Noheria A, Baddour LM, Pardi DS. Acute kidney injury is an  
560 independent marker of severity in Clostridium difficile infection: a nationwide survey. *Journal of*  
561 *clinical gastroenterology*. 2013;47(6):481-4.
- 562 68. Kim J, Kim H, Oh HJ, Kim HS, Hwang YJ, Yong D, et al. Fecal Calprotectin Level Reflects the  
563 Severity of Clostridium difficile Infection. *Annals of laboratory medicine*. 2017;37(1):53-7.
- 564 69. Kim J, Kim Y, Pai H. Clinical Characteristics and Treatment Outcomes of Clostridium difficile  
565 Infections by PCR Ribotype 017 and 018 Strains. *PloS one*. 2016;11(12):e0168849.
- 566 70. Kulaylat AS, Buonomo EL, Scully KW, Hollenbeak CS, Cook H, Petri WA, Jr., et al. Development  
567 and Validation of a Prediction Model for Mortality and Adverse Outcomes Among Patients With  
568 Peripheral Eosinopenia on Admission for Clostridium difficile Infection. *JAMA surgery*.  
569 2018;153(12):1127-33.
- 570 71. Lee HC, Kim KO, Jeong YH, Lee SH, Jang BI, Kim TN. Clinical Outcomes in Hospitalized Patients  
571 with Clostridium difficile Infection by Age Group. *The Korean journal of gastroenterology = Taehan*  
572 *Sohwagi Hakhoe chi*. 2016;67(2):81-6.
- 573 72. Leibovici-Weissman Y, Atamna A, Schlesinger A, Eliakim-Raz N, Bishara J, Yahav D. Risk factors  
574 for short- and long-term mortality in very old patients with Clostridium difficile infection: A  
575 retrospective study. *Geriatrics & gerontology international*. 2017;17(10):1378-83.
- 576 73. Mascart G, Delmee M, Van Broeck J, Cytryn E, Karmali R, Cherifi S. Impact of ribotype 027 on  
577 Clostridium difficile infection in a geriatric department. *European journal of clinical microbiology &*  
578 *infectious diseases : official publication of the European Society of Clinical Microbiology*.  
579 2013;32(9):1177-82.
- 580 74. Miller M, Gravel D, Mulvey M, Taylor G, Boyd D, Simor A, et al. Health care-associated  
581 Clostridium difficile infection in Canada: patient age and infecting strain type are highly predictive of  
582 severe outcome and mortality. *Clin Infect Dis*. 2010;50(2):194-201.
- 583 75. Morrison RH, Hall NS, Said M, Rice T, Groff H, Brodine SK, et al. Risk factors associated with  
584 complications and mortality in patients with Clostridium difficile infection. *Clin Infect Dis*.  
585 2011;53(12):1173-8.
- 586 76. Ogielska M, Lanotte P, Le Brun C, Valentin AS, Garot D, Tellier AC, et al. Emergence of  
587 community-acquired Clostridium difficile infection: the experience of a French hospital and review of  
588 the literature. *International journal of infectious diseases : IJID : official publication of the*  
589 *International Society for Infectious Diseases*. 2015;37:36-41.
- 590 77. Patel UC, Wieczorkiewicz JT, Tuazon J. Evaluation of advanced age as a risk factor for severe  
591 Clostridium difficile infection. *Journal of Clinical Gerontology and Geriatrics*. 2016;7(1):12-6.
- 592 78. Pepin J, Valiquette L, Alary ME, Villemure P, Pelletier A, Forget K, et al. Clostridium difficile-  
593 associated diarrhea in a region of Quebec from 1991 to 2003: a changing pattern of disease severity.  
594 *Cmaj*. 2004;171(5):466-72.
- 595 79. Polivkova S, Krutova M, Petrlova K, Benes J, Nyc O. Clostridium difficile ribotype 176 - A  
596 predictor for high mortality and risk of nosocomial spread? *Anaerobe*. 2016;40:35-40.

- 597 80. Rao K, Micic D, Chenoweth E, Deng L, Galecki AT, Ring C, et al. Poor functional status as a risk  
598 factor for severe *Clostridium difficile* infection in hospitalized older adults. *Journal of the American*  
599 *Geriatrics Society*. 2013;61(10):1738-42.
- 600 81. Rao K, Micic D, Natarajan M, Winters S, Kiel MJ, Walk ST, et al. *Clostridium difficile* ribotype  
601 027: relationship to age, detectability of toxins A or B in stool with rapid testing, severe infection, and  
602 mortality. *Clin Infect Dis*. 2015;61(2):233-41.
- 603 82. Reigadas E, Alcalá L, Marin M, Martín A, Iglesias C, Bouza E. Role of binary toxin in the  
604 outcome of *Clostridium difficile* infection in a non-027 ribotype setting. *Epidemiology and Infection*.  
605 2016;144(2):268-73.
- 606 83. Sailhamer EA, Carson K, Chang Y, Zacharias N, Spaniolas K, Tabbara M, et al. Fulminant  
607 *Clostridium difficile* colitis: patterns of care and predictors of mortality. *Arch Surg*. 2009;144(5):433-  
608 9; discussion 9-40.
- 609 84. Scardina T, Labuszewski L, Pacheco SM, Adams W, Schreckenberger P, Johnson S. *Clostridium*  
610 *difficile* infection (CDI) severity and outcome among patients infected with the NAP1/BI/027 strain in  
611 a non-epidemic setting. *Infect Control Hosp Epidemiol*. 2015;36(3):280-6.
- 612 85. See I, Mu Y, Cohen J, Beldavs ZG, Winston LG, Dumyati G, et al. NAP1 strain type predicts  
613 outcomes from *Clostridium difficile* infection. *Clin Infect Dis*. 2014;58(10):1394-400.
- 614 86. Serafino S, Consonni D, Migone De Amicis M, Sisto F, Domeniconi G, Formica S, et al. Clinical  
615 outcomes of *Clostridium difficile* infection according to strain type. A prospective study in medical  
616 wards. *European journal of internal medicine*. 2018;54:21-6.
- 617 87. Shivashankar R, Khanna S, Kammer PP, Harmsen WS, Zinsmeister AR, Baddour LM, et al.  
618 Clinical factors associated with development of severe-complicated *Clostridium difficile* infection.  
619 *Clinical gastroenterology and hepatology : the official clinical practice journal of the American*  
620 *Gastroenterological Association*. 2013;11(11):1466-71.
- 621 88. Starzengruber P, Segagni Lusignani L, Wrba T, Mitteregger D, Indra A, Graninger W, et al.  
622 Severe *Clostridium difficile* infection: incidence and risk factors at a tertiary care university hospital in  
623 Vienna, Austria. *Wiener klinische Wochenschrift*. 2014;126(13-14):427-30.
- 624 89. Tamez-Torres KM, Torres-Gonzalez P, Leal-Vega F, Garcia-Alderete A, Lopez Garcia NI,  
625 Mendoza-Aguilar R, et al. Impact of *Clostridium difficile* infection caused by the NAP1/RT027 strain  
626 on severity and recurrence during an outbreak and transition to endemicity in a Mexican tertiary care  
627 center. *International journal of infectious diseases : IJID : official publication of the International*  
628 *Society for Infectious Diseases*. 2017;65:44-9.
- 629 90. Taori SK, Wroe A, Hardie A, Gibb AP, Poxton IR. A prospective study of community-associated  
630 *Clostridium difficile* infections: the role of antibiotics and co-infections. *The Journal of Infection*.  
631 2014;69(2):134-44.
- 632 91. Tschudin-Sutter S, Braissant O, Erb S, Strandén A, Bonkat G, Frei R, et al. Growth Patterns of  
633 *Clostridium difficile* - Correlations with Strains, Binary Toxin and Disease Severity: A Prospective  
634 Cohort Study. *PloS one*. 2016;11(9):e0161711.
- 635 92. van der Wilden GM, Chang Y, Cropano C, Subramanian M, Schipper IB, Yeh DD, et al.  
636 Fulminant *Clostridium difficile* colitis: prospective development of a risk scoring system. *The journal*  
637 *of trauma and acute care surgery*. 2014;76(2):424-30.
- 638 93. Vojtilova L, Freibergova M, Jurankova J, Bortlicek Z, Husa P. Epidemiological factors  
639 influencing the development of relapsing and severe *Clostridium difficile* infection. *Epidemiologie,*  
640 *mikrobiologie, imunologie : casopis Spolecnosti pro epidemiologii a mikrobiologii Ceske lekarske*  
641 *spolecnosti JE Purkyne*. 2014;63(1):27-35.
- 642 94. Walk ST, Micic D, Jain R, Lo ES, Trivedi I, Liu EW, et al. *Clostridium difficile* Ribotype Does Not  
643 Predict Severe Infection. *Clin Infect Dis*. 2012;55(12):1661-8.
- 644 95. Walker AS, Eyre DW, Wyllie DH, Dingle KE, Griffiths D, Shine B, et al. Relationship between  
645 bacterial strain type, host biomarkers, and mortality in *Clostridium difficile* infection. *Clin Infect Dis*.  
646 2013;56(11):1589-600.

- 647 96. Wilson V, Cheek L, Satta G, Walker-Bone K, Cubbon M, Citron D, et al. Predictors of death  
648 after *Clostridium difficile* infection: a report on 128 strain-typed cases from a teaching hospital in the  
649 United Kingdom. *Clin Infect Dis*. 2010;50(12):e77-81.
- 650 97. Xu Q, Chen Y, Gu S, Lv T, Zheng B, Shen P, et al. Hospital-acquired *Clostridium difficile*  
651 infection in Mainland China: A seven-year (2009-2016) retrospective study in a large university  
652 hospital. *Scientific reports*. 2017;7(1):9645.
- 653 98. Yong FA, Alvarado AM, Wang H, Tsai J, Estes NC. Appendectomy: a risk factor for colectomy  
654 in patients with *Clostridium difficile*. *American journal of surgery*. 2015;209(3):532-5.
- 655 99. Miller R, Morillas JA, Brizendine KD, Fraser TG. Predictors of *Clostridioides difficile* Infection-  
656 Related Complications and Treatment Patterns among Nucleic Acid Amplification Test-Positive/Toxin  
657 Enzyme Immunoassay-Negative Patients. *J Clin Microbiol*. 2020;58(3).
- 658 100. Menon A, Perry DA, Motyka J, Weiner S, Standke A, Penkevich A, et al. Changes in the  
659 Association between Diagnostic Testing Method, PCR Ribotype, and Clinical Outcomes from  
660 *Clostridioides difficile* Infection: One Institution's Experience. *Clin Infect Dis*. 2020.
- 661 101. Korac M, Rupnik M, Nikolic N, Jovanovic M, Tosic T, Malinic J, et al. *Clostridioides difficile*  
662 ribotype distribution in a large teaching hospital in Serbia. *Gut Pathog*. 2020;12:26.
- 663 102. Essrani R, Saturno D, Mehershahi S, Essrani RK, Hossain MR, Ravi SJK, et al. The Impact of  
664 Appendectomy in *Clostridium difficile* Infection and Length of Hospital Stay. *Cureus*.  
665 2020;12(9):e10342.
- 666 103. Choi B, Wong KK, Dunn AN, Butler R, Fraser TG, Procop GW, et al. Real-time polymerase  
667 chain reaction (PCR) cycle threshold and *Clostridioides difficile* infection outcomes. *Infect Control*  
668 *Hosp Epidemiol*. 2021:1-7.
- 669 104. Avni T, Hammud H, Itzhaki O, Gafter-Gvili A, Rozen-Zvi B, Ben-Zvi H, et al. The significance of  
670 acute kidney injury in *Clostridioides difficile* infection. *Int J Clin Pract*. 2021;75(3).
- 671 105. Mendez-Bailon M, Jimenez-Garcia R, Hernandez-Barrera V, Miguel-Diez J, Miguel-Yanes JM,  
672 Munoz-Rivas N, et al. Heart Failure Is a Risk Factor for Suffering and Dying of *Clostridium difficile*  
673 Infection. Results of a 15-Year Nationwide Study in Spain. *J Clin Med*. 2020;9(3).
- 674 106. Chiang HY, Huang HC, Chung CW, Yeh YC, Chen YC, Tien N, et al. Risk prediction for 30-day  
675 mortality among patients with *Clostridium difficile* infections: a retrospective cohort study.  
676 *Antimicrob Resist Infect Control*. 2019;8:175.
- 677 107. Vata A, Miftode IL, Dorneanu OS, Vata LG, Miftode D, Trifan A, et al. CLOSTRIDIUM DIFFICILE  
678 INFECTION IN PATIENTS WITH TYPE 2 DIABETES MELLITUS. THE EXPERIENCE OF AN INFECTIOUS  
679 DISEASES HOSPITAL FROM NORTH-EASTERN ROMANIA. *Med-Surg J*. 2019;123(3):506-12.
- 680 108. Mani NS, Lynch JB, Fang FC, Chan JD. Risk Factors for BI/NAP1/027 *Clostridioides difficile*  
681 Infections and Clinical Outcomes Compared With Non-NAP1 Strains. *Open Forum Infect Dis*.  
682 2019;6(12):4.
- 683 109. Khanna S, Aronson SL, Kammer PP, Baddour LM, Pardi DS. Gastric acid suppression and  
684 outcomes in *Clostridium difficile* infection: a population-based study. *Mayo Clinic proceedings*.  
685 2012;87(7):636-42.
- 686 110. Planche TD, Davies KA, Coen PG, Finney JM, Monahan IM, Morris KA, et al. Differences in  
687 outcome according to *Clostridium difficile* testing method: a prospective multicentre diagnostic  
688 validation study of *C difficile* infection. *The Lancet Infectious diseases*. 2013;13(11):936-45.
- 689 111. Bauer MP, Notermans DW, van Benthem BH, Brazier JS, Wilcox MH, Rupnik M, et al.  
690 *Clostridium difficile* infection in Europe: a hospital-based survey. *Lancet*. 2011;377(9759):63-73.
- 691 112. Argamany JR, Lee GC, Duhon BD, Zeidan AR, Young EH, Reveles KR. A possible association  
692 between statin use and improved *Clostridioides difficile* infection mortality in veterans. *PloS one*.  
693 2019;14(5):e0217423.
- 694 113. Leal J, Ronksley P, Henderson EA, Conly J, Manns B. Predictors of mortality and length of stay  
695 in patients with hospital-acquired *Clostridioides difficile* infection: a population-based study in  
696 Alberta, Canada. *The Journal of hospital infection*. 2019;103(1):85-91.

- 697 114. Nagayoshi Y, Yamamoto K, Sato S, Suyama N, Izumikawa T, Izumikawa K, et al. Clinical  
698 significance of a positive *Clostridioides difficile* glutamate dehydrogenase test on the outcomes of  
699 hospitalized older patients. *Geriatrics & gerontology international*. 2020;20(12):1138-44.
- 700 115. Patel H, Makker J, Vakde T, Shaikh D, Badipatla K, Dunne J, et al. Nonsteroidal Anti-  
701 Inflammatory Drugs Impact on the Outcomes of Hospitalized Patients with *Clostridium difficile*  
702 Infection. *Clinical and experimental gastroenterology*. 2019;12:449-56.
- 703 116. Tay HL, Chow A, Ng TM, Lye DC. Risk factors and treatment outcomes of severe *Clostridioides*  
704 *difficile* infection in Singapore. *Scientific reports*. 2019;9(1):13440.
- 705 117. Origuen J, Orellana MA, Fernandez-Ruiz M, Corbella L, San Juan R, Ruiz-Ruigomez M, et al.  
706 Toxin B PCR Amplification Cycle Threshold Adds Little to Clinical Variables for Predicting Outcomes in  
707 *Clostridium difficile* Infection: a Retrospective Cohort Study. *J Clin Microbiol*. 2019;57(2).
- 708 118. Milenkovic B, Suljagic V, Peric A, Dragojevic-Simic V, Tarabar O, Milanovic M, et al. Outcomes  
709 of *Clostridioides difficile* infection in adult cancer and non-cancer patients hospitalised in a tertiary  
710 hospital: a prospective cohort study. *Eur J Hosp Pharm*. 2021.
- 711 119. Lopez-Cardenas S, Torres-Martos E, Mora-Delgado J, Sanchez-Calvo JM, Santos-Pena M,  
712 Zapata Lopez A, et al. The prognostic value of toxin B and binary toxin in *Clostridioides difficile*  
713 infection. *Gut Microbes*. 2021:1-8.
- 714 120. Enoch DA, Murray-Thomas T, Adomakoh N, Dedman D, Georgopali A, Francis NA, et al. Risk  
715 of complications and mortality following recurrent and non-recurrent *Clostridioides difficile* infection:  
716 a retrospective observational database study in England. *The Journal of hospital infection*.  
717 2020;106(4):793-803.
- 718 121. Carlson TJ, Endres BT, Le Pham J, Gonzales-Luna AJ, Alnezary FS, Nebo K, et al. Eosinopenia  
719 and Binary Toxin Increase Mortality in Hospitalized Patients With *Clostridioides difficile* Infection.  
720 *Open Forum Infect Dis*. 2020;7(1):ofz552.
- 721 122. Abdelfatah M, Nayfe R, Nijim A, Enriquez K, Ali E, Watkins RR, et al. Factors Predicting  
722 Recurrence of *Clostridium difficile* Infection (CDI) in Hospitalized Patients: Retrospective Study of  
723 More Than 2000 Patients. *J Investig Med*. 2015;63(5):747-51.
- 724 123. Appaneal HJ, Caffrey AR, Beganovic M, Avramovic S, LaPlante KL. Predictors of *Clostridioides*  
725 *difficile* recurrence across a national cohort of veterans in outpatient, acute, and long-term care  
726 settings. *Am J Health Syst Pharm*. 2019;76(9):581-90.
- 727 124. Avni T, Babitch T, Ben-Zvi H, Hijazi R, Ayada G, Atamna A, et al. *Clostridioides difficile*  
728 infection in immunocompromised hospitalized patients is associated with a high recurrence rate. *Int J*  
729 *Infect Dis*. 2020;90:237-42.
- 730 125. Carpenter BP, Hennessey EK, Bryant AM, Khoury JA, Crannage AJ. Identification of Factors  
731 Impacting Recurrent *Clostridium difficile* Infection and Development of a Risk Evaluation Tool. *J*  
732 *Pharm Pharm Sci*. 2016;19(3):349-56.
- 733 126. Dharbhamulla N, Abdelhady A, Domadia M, Patel S, Gaughan J, Roy S. Risk Factors Associated  
734 With Recurrent *Clostridium difficile* Infection. *J Clin Med Res*. 2019;11(1):1-6.
- 735 127. Drekonja DM, Amundson WH, Decarolis DD, Kuskowski MA, Lederle FA, Johnson JR.  
736 Antimicrobial use and risk for recurrent *Clostridium difficile* infection. *Am J Med*. 2011;124(11):1081  
737 e1-7.
- 738 128. Eyre DW, Walker AS, Wyllie D, Dingle KE, Griffiths D, Finney J, et al. Predictors of first  
739 recurrence of *Clostridium difficile* infection: implications for initial management. *Clin Infect Dis*.  
740 2012;55 Suppl 2:S77-87.
- 741 129. Falcone M, Tiseo G, Iraci F, Raponi G, Goldoni P, Delle Rose D, et al. Risk factors for  
742 recurrence in patients with *Clostridium difficile* infection due to 027 and non-027 ribotypes. *Clin*  
743 *Microbiol Infect*. 2019;25(4):474-80.
- 744 130. Freedberg DE, Salmasian H, Friedman C, Abrams JA. Proton pump inhibitors and risk for  
745 recurrent *Clostridium difficile* infection among inpatients. *Am J Gastroenterol*. 2013;108(11):1794-  
746 801.
- 747 131. Fujii LF, J. Crowell, M. DiBaise, K. Appendectomy and Risk of *Clostridium difficile* Recurrence.  
748 *Infectious Diseases in Clinical Practice*. 2013;21(1):28-32.

- 749 132. Im GY, Modayil RJ, Lin CT, Geier SJ, Katz DS, Feuerman M, et al. The appendix may protect  
750 against *Clostridium difficile* recurrence. *Clinical gastroenterology and hepatology : the official clinical*  
751 *practice journal of the American Gastroenterological Association*. 2011;9(12):1072-7.
- 752 133. Kimura T, Snijder R, Sugitani T. Characterization and risk factors for recurrence of  
753 *Clostridioides (Clostridium) difficile* infection in Japan: A nationwide real-world analysis using a large  
754 hospital-based administrative dataset. *J Infect Chemother*. 2019;25(8):615-20.
- 755 134. Lavergne V, Beausejour Y, Pichette G, Ghannoum M, Su SH. Lymphopenia as a novel marker  
756 of *Clostridium difficile* infection recurrence. *The Journal of infection*. 2013;66(2):129-35.
- 757 135. Linsky A, Gupta K, Lawler EV, Fonda JR, Hermos JA. Proton pump inhibitors and risk for  
758 recurrent *Clostridium difficile* infection. *Arch Intern Med*. 2010;170(9):772-8.
- 759 136. Louie TJ, Miller MA, Crook DW, Lentnek A, Bernard L, High KP, et al. Effect of age on  
760 treatment outcomes in *Clostridium difficile* infection. *Journal of the American Geriatrics Society*.  
761 2013;61(2):222-30.
- 762 137. Lupse M, Flonta M, Cioara A, Filipescu I, Todor N. Predictors of first recurrence in *Clostridium*  
763 *difficile*-associated disease. A study of 306 patients hospitalized in a Romanian tertiary referral  
764 center. *J Gastrointestin Liver Dis*. 2013;22(4):397-403.
- 765 138. Marincu I, Bratosin F, Vidican I, Cerbu B, Turaiche M, Tirnea L, et al. Predictive Factors for the  
766 First Recurrence of *Clostridioides difficile* Infection in the Elderly from Western Romania. *Medicina*  
767 (Kaunas). 2020;56(9).
- 768 139. McDonald EG, Milligan J, Frenette C, Lee TC. Continuous Proton Pump Inhibitor Therapy and  
769 the Associated Risk of Recurrent *Clostridium difficile* Infection. *JAMA Intern Med*. 2015;175(5):784-  
770 91.
- 771 140. McFarland LV, Surawicz CM, Rubin M, Fekety R, Elmer GW, Greenberg RN. Recurrent  
772 *Clostridium difficile* disease: epidemiology and clinical characteristics. *Infect Control Hosp Epidemiol*.  
773 1999;20(1):43-50.
- 774 141. Na'amnih W, Adler A, Miller-Roll T, Cohen D, Carmeli Y. Risk factors for recurrent *Clostridium*  
775 *difficile* infection in a tertiary hospital in Israel. *European journal of clinical microbiology & infectious*  
776 *diseases : official publication of the European Society of Clinical Microbiology*. 2018;37(7):1281-8.
- 777 142. Negrut N, Bungau S, Behl T, Khan SA, Vesa CM, Bustea C, et al. Risk Factors Associated with  
778 Recurrent *Clostridioides difficile* Infection. *Healthcare*. 2020;8(3):12.
- 779 143. Origüen J, Orellana M, Fernández-Ruiz M, Corbella L, San Juan R, Ruiz-Ruigómez M, et al.  
780 Toxin B PCR Amplification Cycle Threshold Adds Little to Clinical Variables for Predicting Outcomes in  
781 *Clostridium difficile* Infection: a Retrospective Cohort Study. *J Clin Microbiol*. 2019;57(2).
- 782 144. Pepin J, Alary ME, Valiquette L, Raiche E, Ruel J, Fulop K, et al. Increasing risk of relapse after  
783 treatment of *Clostridium difficile* colitis in Quebec, Canada. *Clin Infect Dis*. 2005;40(11):1591-7.
- 784 145. Rao K, Higgins PDR, Young VB. An Observational Cohort Study of *Clostridium difficile* Ribotype  
785 027 and Recurrent Infection. *mSphere*. 2018;3(3).
- 786 146. Rodriguez-Pardo D, Almirante B, Bartolome RM, Pomar V, Mirelis B, Navarro F, et al.  
787 Epidemiology of *Clostridium difficile* infection and risk factors for unfavorable clinical outcomes:  
788 results of a hospital-based study in Barcelona, Spain. *J Clin Microbiol*. 2013;51(5):1465-73.
- 789 147. Rotramel A, Poritz LS, Messaris E, Berg A, Stewart DB. PPI therapy and albumin are better  
790 predictors of recurrent *Clostridium difficile* colitis than choice of antibiotics. *Journal of*  
791 *gastrointestinal surgery : official journal of the Society for Surgery of the Alimentary Tract*.  
792 2012;16(12):2267-73.
- 793 148. van Beurden YH, Nezami S, Mulder CJJ, Vandenbroucke-Grauls C. Host factors are more  
794 important in predicting recurrent *Clostridium difficile* infection than ribotype and use of antibiotics.  
795 *Clin Microbiol Infect*. 2018;24(1):85 e1- e4.
- 796 149. Zilberberg MD, Reske K, Olsen M, Yan Y, Dubberke ER. Risk factors for recurrent *Clostridium*  
797 *difficile* infection (CDI) hospitalization among hospitalized patients with an initial CDI episode: a  
798 retrospective cohort study. *BMC Infect Dis*. 2014;14:306.



- 799 150. Cadena J, Thompson GR, 3rd, Patterson JE, Nakashima B, Owens A, Echevarria K, et al. Clinical  
800 predictors and risk factors for relapsing *Clostridium difficile* infection. *Am J Med Sci*. 2010;339(4):350-  
801 5.
- 802 151. Shakov R, Salazar RS, Kagunye SK, Baddoura WJ, DeBari VA. Diabetes mellitus as a risk factor  
803 for recurrence of *Clostridium difficile* infection in the acute care hospital setting. *American journal of*  
804 *infection control*. 2011;39(3):194-8.
- 805 152. Fekety R, McFarland LV, Surawicz CM, Greenberg RN, Elmer GW, Mulligan ME. Recurrent  
806 *Clostridium difficile* diarrhea: characteristics of and risk factors for patients enrolled in a prospective,  
807 randomized, double-blinded trial. *Clin Infect Dis*. 1997;24(3):324-33.
- 808 153. Ryu HS, Kim YS, Seo GS, Lee YM, Choi SC. Risk Factors for Recurrent *Clostridium difficile*  
809 Infection. *Intest Res*. 2012;10(2):176-82.
- 810 154. Golan Y, DuPont HL, Aldomiro F, Jensen EH, Hanson ME, Dorr MB. Renal Impairment, *C.*  
811 *difficile* Recurrence, and the Differential Effect of Bezlotoxumab: A Post Hoc Analysis of Pooled Data  
812 From 2 Randomized Clinical Trials. *Open Forum Infect Dis*. 2020;7(7):ofaa248.
- 813 155. Weiss K, Louie T, Miller MA, Mullane K, Crook DW, Gorbach SL. Effects of proton pump  
814 inhibitors and histamine-2 receptor antagonists on response to fidaxomicin or vancomycin in patients  
815 with *Clostridium difficile*-associated diarrhoea. *BMJ Open Gastroenterol*. 2015;2(1):e000028.
- 816 156. Gerding DN, Kelly CP, Rahav G, Lee C, Dubberke ER, Kumar PN, et al. Bezlotoxumab for  
817 Prevention of Recurrent *Clostridium difficile* Infection in Patients at Increased Risk for Recurrence.  
818 *Clin Infect Dis*. 2018;67(5):649-56.
- 819 157. Crook DW, Walker AS, Kean Y, Weiss K, Cornely OA, Miller MA, et al. Fidaxomicin versus  
820 vancomycin for *Clostridium difficile* infection: meta-analysis of pivotal randomized controlled trials.  
821 *Clin Infect Dis*. 2012;55 Suppl 2:S93-103.
- 822 158. Wilcox MH, Gerding DN, Poxton IR, Kelly C, Nathan R, Birch T, et al. Bezlotoxumab for  
823 Prevention of Recurrent *Clostridium difficile* Infection. *N Engl J Med*. 2017;376(4):305-17.
- 824 159. Louie TJ, Miller MA, Mullane KM, Weiss K, Lentnek A, Golan Y, et al. Fidaxomicin versus  
825 vancomycin for *Clostridium difficile* infection. *N Engl J Med*. 2011;364(5):422-31.
- 826 160. Cornely OA, Crook DW, Esposito R, Poirier A, Somero MS, Weiss K, et al. Fidaxomicin versus  
827 vancomycin for infection with *Clostridium difficile* in Europe, Canada, and the USA: a double-blind,  
828 non-inferiority, randomised controlled trial. *The Lancet Infectious diseases*. 2012;12(4):281-9.
- 829 161. Charlson ME, Pompei P, Ales KL, MacKenzie CR. A new method of classifying prognostic  
830 comorbidity in longitudinal studies: development and validation. *Journal of chronic diseases*.  
831 1987;40(5):373-83.
- 832 162. Abou Chakra CN, Pepin J, Sirard S, Valiquette L. Risk factors for recurrence, complications and  
833 mortality in *Clostridium difficile* infection: a systematic review. *PLoS one*. 2014;9(6):e98400.
- 834 163. Deshpande A, Pasupuleti V, Thota P, Pant C, Rolston DD, Hernandez AV, et al. Risk factors for  
835 recurrent *Clostridium difficile* infection: a systematic review and meta-analysis. *Infect Control Hosp*  
836 *Epidemiol*. 2015;36(4):452-60.
- 837 164. Garey KW, Sethi S, Yadav Y, DuPont HL. Meta-analysis to assess risk factors for recurrent  
838 *Clostridium difficile* infection. *The Journal of hospital infection*. 2008;70(4):298-304.
- 839 165. Zhang VRY, Woo ASJ, Scaduto C, Cruz MTK, Tan YY, Du H, et al. Systematic review on the  
840 definition and predictors of severe *Clostridioides difficile* infection. *Journal of gastroenterology and*  
841 *hepatology*. 2021;36(1):89-104.
- 842 166. Dahabreh IJ, Kent DM. Index event bias as an explanation for the paradoxes of recurrence  
843 risk research. *Jama*. 2011;305(8):822-3.
- 844 167. Phatharacharukul P, Thongprayoon C, Cheungpasitporn W, Edmonds PJ, Mahaparn P,  
845 Bruminhent J. The Risks of Incident and Recurrent *Clostridium difficile*-Associated Diarrhea in Chronic  
846 Kidney Disease and End-Stage Kidney Disease Patients: A Systematic Review and Meta-Analysis.  
847 *Digestive diseases and sciences*. 2015;60(10):2913-22.
- 848 168. Dalal RS, Allegretti JR. Diagnosis and management of *Clostridioides difficile* infection in  
849 patients with inflammatory bowel disease. *Current opinion in gastroenterology*. 2021;37(4):336-43.

850 169. Beaugard-Paultre C, Abou Chakra CN, McGeer A, Labbé AC, Simor AE, Gold W, et al.  
851 External validation of clinical prediction rules for complications and mortality following Clostridioides  
852 difficile infection. PloS one. 2019;14(12):e0226672.  
853 170. van Beurden YH, Hensgens MPM, Dekkers OM, Le Cessie S, Mulder CJJ, Vandenbroucke-  
854 Grauls C. External Validation of Three Prediction Tools for Patients at Risk of a Complicated Course of  
855 Clostridium difficile Infection: Disappointing in an Outbreak Setting. Infect Control Hosp Epidemiol.  
856 2017;38(8):897-905.  
857 171. van Rossen TM, van Dijk LJ, Heymans MW, Dekkers OM, Vandenbroucke-Grauls C, van  
858 Beurden YH. External validation of two prediction tools for patients at risk for recurrent Clostridioides  
859 difficile infection. Therapeutic advances in gastroenterology. 2021;14:1756284820977385.

860

## 861 **Supplementary data**

### 862 **PICO's**

863 Two PICO's were formulated:

864 Prognosis severe CDI:

865 P: patients with CDI  
866 I: presence of clinical and laboratory parameters  
867 C: absence of clinical and laboratory parameters  
868 O: severe CDI

869 Prognosis recurrent CDI:

870 P: patients with CDI  
871 I: presence of clinical and laboratory parameters  
872 C: absence of clinical and laboratory parameters  
873 O: recurrent CDI

### 874 **Literature search prognosis severe CDI - Pubmed**

875 (("Clostridium difficile Infection"[tw] OR "Clostridium difficile Infections"[tw] OR "C difficile  
876 Infection"[tw] OR "C difficile Infections"[tw] OR "clostridioides difficile infection"[tw] OR  
877 ("Clostridium difficile"[majr] OR "Clostridium difficile"[ti] OR "C difficile"[ti] OR "c diff"[ti] OR  
878 "clostridioides difficile"[ti]) AND ("Clostridium Infections"[majr] OR "Clostridium Infection"[ti] OR  
879 "Clostridium Infection"[ti])) OR ("Clostridium difficile"[majr] OR "Clostridium difficile"[ti] OR "C  
880 difficile"[ti] OR "difficile"[ti]) AND ("Clostridium Infections"[majr] OR "Clostridium Infection"[ti] OR  
881 "Clostridium Infection"[ti] OR "Infection"[majr] OR "infection"[ti] OR "infections"[ti] OR infect\*[ti] OR  
882 "inflammation"[ti] OR inflammat\*[ti] OR "Enterocolitis"[majr] OR "Enterocolitis"[ti] OR "colitis"[ti] OR  
883 "Digestive System Diseases"[majr]))))

884 **AND**

885 ("Prognosis"[Mesh] OR prognos\*[tw] OR "prognostic factor"[tw] OR "prognostic factors"[tw] OR  
886 "clinical parameter"[tw] OR "clinical parameters"[tw] OR "laboratory parameter"[tw] OR "laboratory  
887 parameters"[tw] OR "Age Factors"[mesh] OR "Age Factor"[tw] OR "Age Factors"[tw] OR "Age"[tiab]  
888 OR "Age Reporting"[tw] OR "Leukocytosis"[Mesh] OR "Leukocytosis"[tw] OR "Pleocytosis"[tw] OR  
889 "leucocytosis"[tw] OR "Leukemoid Reaction"[tw] OR "Lymphocytosis"[tw] OR (decreas\*[tw] AND  
890 ("Serum Albumin"[mesh] OR "blood albumin"[tw] OR "serum albumin"[tw])) OR (("rise"[tw] OR

891 "rising"[tw] OR rise\*[tw] OR increas\*[tw]) AND ("serum creatinine"[tw] OR  
892 "Creatinine/blood"[mesh]) OR "severe underlying disease"[tw] OR "severe underlying diseases"[tw]  
893 OR "severe underlying illness"[tw] OR "severe underlying illnesses"[tw] OR "severe underlying  
894 condition"[tw] OR "severe underlying conditions"[tw] OR "Immunologic Deficiency  
895 Syndromes"[Mesh] OR "Immunologic Deficiency"[tw] OR "Immune Deficiency"[tw] OR  
896 "immunodeficiency"[tw] OR "Immunologic Deficiencies"[tw] OR "Immune Deficiencies"[tw] OR  
897 "immunodeficiencies"[tw] OR "Immunocompromised Host"[Mesh] OR "Immunocompromised"[tw]  
898 OR (strain\*[tw] AND ribotype\*[tw]))

899 **AND**

900 ("severe clostridium difficile"[tw] OR "severe cdi"[tw] OR "severe cd"[tw] OR "disease severity"[tw]  
901 OR "illness severity"[tw] OR "severity of disease"[tw] OR "severity of illness"[tw] OR "severe"[tw] OR  
902 "severity"[tw] OR sever\*[tw])

903 **NOT**

904 (("Case Reports"[ptyp] OR "case report"[ti]) NOT ("Review"[ptyp] OR "review"[ti] OR "Clinical  
905 Study"[ptyp] OR "trial"[ti] OR "RCT"[ti])) NOT ("Animals"[mesh] NOT "Humans"[mesh])

906 **AND**

907 english[la])

908 **Literature search prognosis recurrent CDI - Pubmed:**

909 (("Clostridium difficile Infection"[tw] OR "Clostridium difficile Infections"[tw] OR "C difficile  
910 Infection"[tw] OR "C difficile Infections"[tw] OR "clostridioides difficile infection"[tw] OR  
911 ("Clostridium difficile"[majr] OR "Clostridium difficile"[ti] OR "C difficile"[ti] OR "c diff"[ti] OR  
912 "clostridioides difficile"[ti]) AND ("Clostridium Infections"[majr] OR "Clostridium Infection"[ti] OR  
913 "Clostridium Infection"[ti])) OR (("Clostridium difficile"[majr] OR "Clostridium difficile"[ti] OR "C  
914 difficile"[ti] OR "difficile"[ti]) AND ("Clostridium Infections"[majr] OR "Clostridium Infection"[ti] OR  
915 "Clostridium Infection"[ti] OR "Infection"[majr] OR "infection"[ti] OR "infections"[ti] OR infect\*[ti] OR  
916 "inflammation"[ti] OR inflammat\*[ti] OR "Enterocolitis"[majr] OR "Enterocolitis"[ti] OR "colitis"[ti] OR  
917 "Digestive System Diseases"[majr]))

918 **AND**

919 ("Prognosis"[Mesh] OR prognos\*[tw] OR "prognostic factor"[tw] OR "prognostic factors"[tw] OR  
920 "clinical parameter"[tw] OR "clinical parameters"[tw] OR "laboratory parameter"[tw] OR "laboratory  
921 parameters"[tw] OR "Age Factors"[mesh] OR "Age Factor"[tw] OR "Age Factors"[tw] OR "Age"[tiab]  
922 OR "Age Reporting"[tw] OR "severe underlying disease"[tw] OR "severe underlying diseases"[tw] OR  
923 "severe underlying illness"[tw] OR "severe underlying illnesses"[tw] OR "severe underlying  
924 condition"[tw] OR "severe underlying conditions"[tw] OR "Immunologic Deficiency  
925 Syndromes"[Mesh] OR "Immunologic Deficiency"[tw] OR "Immune Deficiency"[tw] OR  
926 "immunodeficiency"[tw] OR "Immunologic Deficiencies"[tw] OR "Immune Deficiencies"[tw] OR  
927 "immunodeficiencies"[tw] OR "Immunocompromised Host"[Mesh] OR "Immunocompromised"[tw]  
928 OR (strain\*[tw] AND ribotype\*[tw]) OR ((continued use\*[tw] OR continuing use\*[tw] OR prolonged  
929 use\*[tw]) AND (antibiotic\*[tw] OR antibacterial\*[tw] OR anti-biotic\*[tw] OR anti-bacterial\*[tw])) OR

930 "renal failure"[tw] OR "kidney failure"[tw] OR "Renal Insufficiency"[Mesh] OR "Renal  
931 Insufficiency"[tw] OR "Kidney Insufficiency"[tw] OR "kidney injury"[tw] OR "renal injury"[tw] OR  
932 previous infection\*[tw] OR "Proton Pump Inhibitors"[Mesh] OR "Proton Pump  
933 Inhibitors"[Pharmacological Action] OR "Proton Pump Inhibitors"[tw] OR "Proton Pump  
934 Inhibitor"[tw] OR "initial severity"[tw] OR "initial disease severity"[tw] OR "initial illness severity"[tw]  
935 OR (strain\*[tw] AND ribotype\*[tw]))

936 **AND**

937 ("recurrent clostridium difficile"[tw] OR "recurrent cdi"[tw] OR "recurrent cd"[tw] OR  
938 "Recurrence"[Mesh] OR recurr\*[tw])

939 **NOT**

940 (("Case Reports"[ptyp] OR "case report"[ti]) NOT ("Review"[ptyp] OR "review"[ti] OR "Clinical  
941 Study"[ptyp] OR "trial"[ti] OR "RCT"[ti])) NOT ("Animals"[mesh] NOT "Humans"[mesh])

942 **AND**

943 english[la])
